# Supplementary material for: Prognostic factors for specific lower extremity and spinal musculoskeletal injuries identified through medical screening and training load monitoring in professional football (soccer): a systematic review
Source: PubMed Central journal article supplement — BMJ Open Sport Exerc Med. 2017 Sep 21;3(1):e000263. doi: 10.1136/bmjsem-2017-000263 (PMC5623323; doi:10.1136/bmjsem-2017-000263), 2017-09-21
Supplement: bmjsem-2017-000263supp002.pdf [file bmjsem-2017-000263supp002.pdf]

Prognostic factors for lower extremity and spinal injuries identified through medical screening and training load monitoring in professional football (soccer): a systematic review

**Online Supplementary File 2: Blank data extraction form**

| Study authors, date published and country of origin |
|-----------------------------------------------------|
|                                                     |

**General Information**

|                                            |  |
|--------------------------------------------|--|
| Date form completed<br><i>(dd/mm/yyyy)</i> |  |
| Name/ID of person extracting data          |  |
| Study title                                |  |
| Notes:                                     |  |

**1 ... Population and setting**

|                                                                                      | Description |
|--------------------------------------------------------------------------------------|-------------|
| 1. <b>Population description</b><br><i>(from which study participants are drawn)</i> |             |
| 2. <b>Setting</b><br><i>(including location)</i>                                     |             |
| 3. <b>Inclusion criteria</b>                                                         |             |
| 4. <b>Exclusion criteria</b>                                                         |             |
| 5. <b>Method/s of recruitment of participants</b>                                    |             |
| 6. <b>Notes:</b>                                                                     |             |

## 2... Participants

Provide overall data and, if available, comparative data for each intervention or comparison group.

|                                                                               | Description as stated in report/paper |
|-------------------------------------------------------------------------------|---------------------------------------|
| 7. Population description<br><i>(from which study participants are drawn)</i> |                                       |
| 8. Total numbers at baseline                                                  |                                       |
| 9. Specific Baseline characteristics                                          |                                       |
| 10. Age range                                                                 |                                       |
| 11. Sex                                                                       |                                       |
| 12. Race/Ethnicity                                                            |                                       |
| 13. Baseline injury status                                                    |                                       |
| 14. Co-morbidities                                                            |                                       |
| 15. Follow up period                                                          |                                       |
| 16. Number of participants at follow up                                       |                                       |
| 17. Reasons for withdrawal/exclusion                                          |                                       |
| 18. Notes:                                                                    |                                       |

### 3 ... Risk of Bias assessment

See QUIPS Appraisal Checklist.

### 4... Prognostic factors investigated

|                                                                                                                                  | Description as stated in report/paper |
|----------------------------------------------------------------------------------------------------------------------------------|---------------------------------------|
| 19. Prognostic factors evaluated and summary measures (e.g. Odds Ratio, Hazard Ratio, Difference in means, Confidence Intervals) |                                       |
| 20. Scales: upper and lower limits<br><i>(indicate whether high or low score is good)</i>                                        |                                       |
| 21. Measurement intervals                                                                                                        |                                       |
| 22. Notes:                                                                                                                       |                                       |

### 4 ... Outcomes

|                          | Description as stated in report/paper |
|--------------------------|---------------------------------------|
| 23. Outcome name         |                                       |
| 24. Time points measured |                                       |
| 25. Time points reported |                                       |

|                                                                                                                                                                | Description as stated in report/paper |
|----------------------------------------------------------------------------------------------------------------------------------------------------------------|---------------------------------------|
| 26. <b>Outcome definition</b><br><i>(with diagnostic criteria if relevant and note whether the outcome is desirable or undesirable if this is not obvious)</i> |                                       |
| 27. <b>Imputation of missing data</b>                                                                                                                          |                                       |
| 28. <b>Notes:</b>                                                                                                                                              |                                       |

## 5 ... Results

*Insert table of data extracted from paper here*

## 6... Other information

|                                                                                                 | Description as stated in report/paper |
|-------------------------------------------------------------------------------------------------|---------------------------------------|
| 29. <b>Key conclusions of study authors</b>                                                     |                                       |
| 30. <b>References to other relevant studies</b>                                                 |                                       |
| 31. <b>Correspondence required for further study information</b><br><i>(what and from whom)</i> |                                       |
| 32. <b>Further study information requested</b><br><i>(from whom, what and when)</i>             |                                       |
| 33. <b>Correspondence received</b><br><i>(from whom, what and when)</i>                         |                                       |
| 34. <b>Notes:</b>                                                                               |                                       |
