# Supplementary material for: Prognostic factors for specific lower extremity and spinal musculoskeletal injuries identified through medical screening and training load monitoring in professional football (soccer): a systematic review
Source: PubMed Central journal article supplement — BMJ Open Sport Exerc Med. 2017 Sep 21;3(1):e000263. doi: 10.1136/bmjsem-2017-000263 (PMC5623323; doi:10.1136/bmjsem-2017-000263), 2017-09-21
Supplement: bmjsem-2017-000263supp003.pdf [file bmjsem-2017-000263supp003.pdf]

Prognostic factors for lower extremity and spinal injuries identified through medical screening and training load monitoring in professional football (soccer): a systematic review

**Online supplementary file 3: Results of univariate and multivariate analyses for all prognostic factors from each study**

**Arnason et al<sup>30</sup>**

*Outcome: Hamstring Muscle Strain injuries*

| <i>Analysis type</i> | <i>Prognostic factors</i>        | <i>OR</i>   | <i>95% CI</i>   | <i>P Value</i>   |
|----------------------|----------------------------------|-------------|-----------------|------------------|
| <i>Univariate</i>    | <b>Previous hamstring injury</b> | <b>7.42</b> | <b>2.9-19.0</b> | <b>&lt;0.001</b> |

| <i>Analysis type</i> | <i>Prognostic factors</i>        | <i>OR</i>    | <i>95% CI</i>   | <i>P Value</i>   |
|----------------------|----------------------------------|--------------|-----------------|------------------|
| <i>Multivariate:</i> | <b>Increasing age</b>            | <b>1.40</b>  | <b>1.2-0.4</b>  | <b>&lt;0.001</b> |
|                      | <b>Previous hamstring injury</b> | <b>11.60</b> | <b>3.5-39.0</b> | <b>&lt;0.001</b> |

Key: OR=odds ratio, CI=confidence interval. Prognostic factors in **bold** denote statistical significance.

*Outcome: Groin Strain injuries*

| <i>Analysis type</i> | <i>Prognostic factors</i>           | <i>OR</i>   | <i>95% CI</i> | <i>P Value</i>   |
|----------------------|-------------------------------------|-------------|---------------|------------------|
| <i>Univariate</i>    | <b>Previous groin strain injury</b> | <b>5.71</b> | <b>2-15.9</b> | <b>&lt;0.001</b> |

| <i>Analysis type</i> | <i>Prognostic factors</i>               | <i>OR</i>   | <i>95% CI</i>   | <i>P Value</i> |
|----------------------|-----------------------------------------|-------------|-----------------|----------------|
| <i>Multivariate</i>  | <b>Previous groin strain</b>            | <b>7.30</b> | <b>2.3-23.2</b> | <b>0.001</b>   |
|                      | <b>Decreased ROM into hip abduction</b> | <b>0.90</b> | <b>0.8-1.0</b>  | <b>0.050</b>   |

Key: OR=odds ratio, CI=confidence interval. Prognostic factors in **bold** denote statistical significance.

*Outcome: Ankle sprain injuries*

| <i>Analysis type</i> | <i>Prognostic factors</i>    | <i>OR</i>   | <i>95% CI</i>   | <i>P Value</i> |
|----------------------|------------------------------|-------------|-----------------|----------------|
| <i>Univariate</i>    | <b>Previous ankle injury</b> | <b>5.31</b> | <b>1.5-19.4</b> | <b>0.009</b>   |

Key: OR=odds ratio, CI=confidence interval. Prognostic factors in **bold** denote statistical significance.

*Outcome: Knee sprain injuries*

| <i>Analysis type</i> | <i>Prognostic factors</i>   | <i>OR</i>   | <i>95% CI</i>   | <i>P Value</i> |
|----------------------|-----------------------------|-------------|-----------------|----------------|
| <i>Univariate</i>    | <b>Previous knee injury</b> | <b>4.56</b> | <b>1.6-13.4</b> | <b>0.002</b>   |

Key: OR=odds ratio, CI=confidence interval. Prognostic factors in **bold** denote statistical significance.

**Bengtsson et al<sup>31</sup>**

*Outcome: Muscle injuries*

| <i>Analysis type</i> | <i>Prognostic factors</i>                                                | <i>RR</i>   | <i>95% CI</i>    | <i>P Value</i>   |
|----------------------|--------------------------------------------------------------------------|-------------|------------------|------------------|
| <i>Multivariate</i>  | IR in matches with $\leq 3$ and $\geq 4$ days recovery                   |             |                  |                  |
|                      | League                                                                   | 1.11        | 0.96-1.28        | 0.151            |
|                      | UCL                                                                      | 1.18        | 0.91-1.54        | 0.208            |
|                      | EL                                                                       | 0.99        | 0.40-2.46        | 0.977            |
|                      | Other cup                                                                | 1.22        | 0.90-1.67        | 0.205            |
|                      | IR in matches with $\leq 4$ and $\geq 6$ days recovery                   |             |                  |                  |
|                      | <b>League</b>                                                            | <b>1.32</b> | <b>1.15-1.51</b> | <b>&lt;0.001</b> |
|                      | UCL                                                                      | 1.66        | 0.85-3.24        | 0.135            |
|                      | EL                                                                       | 0.50        | 0.25-1.01        | 0.055            |
|                      | Other cup                                                                | 1.26        | 0.87- 1.83       | 0.218            |
|                      | IR in matches with $\leq 4$ and $\geq 6$ days recovery: Per muscle group |             |                  |                  |
|                      | <b>Hamstring</b>                                                         | <b>1.28</b> | <b>1.06-1.56</b> | <b>0.011</b>     |
|                      | <b>Quadriceps</b>                                                        | <b>1.80</b> | <b>1.19-2.72</b> | <b>0.006</b>     |
|                      | Adductor                                                                 | 1.11        | 0.84-1.46        | 0.467            |
|                      | Calf                                                                     | 1.13        | 0.75-1.70        | 0.559            |

Key: RR= rate ratio, CI=confidence interval, UCL=UEFA Champions League match, EL=UEFA Europa League Match. Prognostic factors in **bold** denote statistical significance.

Outcome: Ligament injuries

| <i>Analysis type</i> | <i>Prognostic factors</i>                                                           | <i>RR</i> | <i>95% CI</i> | <i>P Value</i> |
|----------------------|-------------------------------------------------------------------------------------|-----------|---------------|----------------|
| <i>Multivariate</i>  | <i>IR in matches with <math>\leq 3</math> and <math>\geq 4</math> days recovery</i> |           |               |                |
|                      | League                                                                              | 0.98      | 0.79-1.20     | 0.819          |
|                      | UCL                                                                                 | 1.00      | 0.68-1.48     | 0.983          |
|                      | EL                                                                                  | 0.88      | 0.21-3.73     | 0.867          |
|                      | Other cup                                                                           | 1.15      | 0.73-1.81     | 0.542          |
|                      | <i>IR in matches with <math>\leq 4</math> and <math>\geq 6</math> days recovery</i> |           |               |                |
|                      | League                                                                              | 0.90      | 0.75-1.09     | 0.292          |
|                      | UCL                                                                                 | 0.81      | 0.39-1.67     | 0.567          |
|                      | EL                                                                                  | 0.45      | 0.17-1.25     | 0.126          |
|                      | Other cup                                                                           | 1.84      | 1.03-3.30     | 0.041          |

Key: RR= rate ratio, CI=confidence interval, UCL=UEFA Champions League match, EL=UEFA Europa League Match. Prognostic factors in **bold** denote statistical significance.

Outcome: All injuries

| <i>Analysis type</i> | <i>Prognostic factors</i>                                                           | <i>RR</i> | <i>95% CI</i> | <i>P Value</i> |
|----------------------|-------------------------------------------------------------------------------------|-----------|---------------|----------------|
| <i>Univariate</i>    | <i>IR in matches with <math>\leq 3</math> and <math>\geq 4</math> days recovery</i> |           |               |                |
|                      | League                                                                              | 1.02      | 0.93-1.11     | 0.713          |
|                      | UCL                                                                                 | 1.11      | 0.95-1.31     | 0.193          |
|                      | EL                                                                                  | 1.26      | 0.76-2.08     | 0.365          |
|                      | Other cup                                                                           | 1.05      | 0.87-1.28     | 0.607          |
|                      | <i>IR in matches with <math>\leq 4</math> and <math>\geq 6</math> days recovery</i> |           |               |                |
|                      | League                                                                              | 1.09      | 1.00-1.18     | 0.045          |
|                      | UCL                                                                                 | 1.22      | 0.85-1.75     | <b>0.290</b>   |
|                      | EL                                                                                  | 0.65      | 0.41-1.03     | 0.064          |
|                      | Other cup                                                                           | 1.18      | 0.94-1.47     | 0.153          |

Key: RR= rate ratio, CI=confidence interval, UCL=UEFA Champions League match, EL=UEFA Europa League Match. Prognostic factors in **bold** denote statistical significance.

**Carling et al**<sup>32</sup>

Outcomes: listed in table

| <i>Analysis type</i> | <i>Prognostic factors</i> | <i>IRR</i>  | <i>95% CI</i>   | <i>P Value</i> |
|----------------------|---------------------------|-------------|-----------------|----------------|
| <i>Univariate</i>    | <i>General strains</i>    |             |                 |                |
|                      | 2 matches ≤ 3 days        | 2.0         | 0.7-5.8         | 0.1944         |
|                      | 3 matches ≤ 4 days        | 2.6         | 0.8-8.7         | 0.1179         |
|                      | <i>Hamstring strain</i>   |             |                 |                |
|                      | 2 matches ≤ 3 days        | 2.0         | 0.8-4.8         | 0.1120         |
|                      | 3 matches ≤ 4 days        | 2.2         | (0.8-8.7)       | 0.1453         |
|                      | <i>Quadriceps strain</i>  |             |                 |                |
|                      | 2 matches ≤ 3 days        | No data     | No data         | No data        |
|                      | 3 matches ≤ 4 days        | No data     | No data         | No data        |
|                      | <i>Groin strain</i>       |             |                 |                |
|                      | 2 matches ≤ 3 days        | 2.7         | 0.2-43.0        | 0.4845         |
|                      | 3 matches ≤ 4 days        | No data     | No data         | No data        |
|                      | <i>Calf strain</i>        |             |                 |                |
|                      | 2 matches ≤ 3 days        | No data     | No data         | No data        |
|                      | 3 matches ≤ 4 days        | No data     | No data         | No data        |
|                      | <i>Ankle sprain</i>       |             |                 |                |
|                      | <b>2 matches ≤ 3 days</b> | <b>5.4</b>  | <b>1.0-29.3</b> | <b>0.052</b>   |
|                      | <b>3 matches ≤ 4 days</b> | <b>10.4</b> | <b>1.9-57.9</b> | <b>0.006</b>   |
|                      | <i>Knee sprain</i>        |             |                 |                |
|                      | 2 matches ≤ 3 days        | No data     | No data         | No data        |
|                      | 3 matches ≤ 4 days        | No data     | No data         | No data        |

**Faude et al<sup>33</sup>**

*Outcome: All injuries*

| <i>Analysis type</i> | <i>Prognostic factors</i> | <i>&gt; 1SD<br/>below<br/>mean<br/>OR</i> | <i>95% CI</i>  | <i>P value</i> | <i>&gt; 1SD<br/>above<br/>mean<br/>OR</i> | <i>95% CI</i>          | <i>P Value</i> |
|----------------------|---------------------------|-------------------------------------------|----------------|----------------|-------------------------------------------|------------------------|----------------|
| <i>Multivariate</i>  | Age (years)               | 0.70                                      | 0.27-<br>1.81  | 0.47           | 1.21                                      | 0.41-<br>3.49          | 0.74           |
|                      | Weight (Kg)               | 0.56                                      | 0.21-<br>1.52  | 0.27           | 1.92                                      | 0.62-<br>5.84          | 0.27           |
|                      | <b>Height (cm)</b>        | 1.70                                      | 0.59-<br>4.85  | 0.34           | <b>9.64</b>                               | <b>1.56-<br/>58.52</b> | <b>0.01</b>    |
|                      | BMI (kg/m <sup>2</sup> )  | 0.58                                      | 0.22-<br>1.54  | 0.29           | 0.68                                      | 0.26-<br>1.76          | 0.44           |
|                      | Games last season         | 1.49                                      | 0.51-<br>4.26  | 0.48           | 0.81                                      | 0.30-<br>2.19          | 0.69           |
|                      | Training time (hours)     | 3.15                                      | 0.91-<br>10.7  | 0.07           | 1.17                                      | 0.48-<br>2.80          | 0.74           |
|                      | <b>Match time (hours)</b> | 0.93                                      | 0.36-<br>2.42  | 0.89           | <b>0.26</b>                               | <b>0.10-<br/>0.67</b>  | <b>0.004</b>   |
|                      | Exposure time (hours)     | 3.17                                      | 0.92-<br>10.73 | 0.07           | 0.90                                      | 0.38-<br>2.15          | 0.82           |

Key: OR=odds ratio, Ci=confidence interval, ACL=anterior cruciate ligament, Kg/m<sup>2</sup>=kilograms per square metre, kg=kilograms, SD=standard deviation. Prognostic factors in **bold** denote statistical significance.

*Outcome: Ankle sprain*

| <i>Analysis type</i> | <i>Prognostic factors</i> | <i>OR</i> | <i>95% CI</i> | <i>P Value</i> |
|----------------------|---------------------------|-----------|---------------|----------------|
| <i>Multivariate</i>  | Previous ankle sprain     | 1.39      | 0.62-3.10     | 0.44           |

Key: OR=odds ratio, Ci=confidence interval. Prognostic factors in **bold** denote statistical significance.

*Outcome: knee sprain*

| <i>Analysis type</i> | <i>Prognostic factors</i> | <i>OR</i> | <i>95% CI</i> | <i>P Value</i> |
|----------------------|---------------------------|-----------|---------------|----------------|
| <i>Multivariate</i>  | Previous knee sprain      | 1.50      | 0.61-3.72     | 0.39           |

Key: OR=odds ratio, Ci=confidence interval. Prognostic factors in **bold** denote statistical significance.

Outcome: ACL tear

| <i>Analysis type</i> | <i>Prognostic factors</i> | <i>OR</i>   | <i>95% CI</i>     | <i>P Value</i> |
|----------------------|---------------------------|-------------|-------------------|----------------|
| <i>Multivariate</i>  | <b>Previous ACL tear</b>  | <b>5.24</b> | <b>1.42-19.59</b> | <b>0.01</b>    |

Key: OR=odds ratio, Ci=confidence interval, ACL=anterior cruciate ligament, Kg/m<sup>2</sup>=kilograms per square metre, kg=kilograms. Prognostic factors in **bold** denote statistical significance.

**Fousekis et al<sup>34</sup>**

Outcome: hamstring strain muscle injury

| <i>Analysis type</i>                           | <i>Prognostic factors</i>                                                               | <i>OR</i>   | <i>95% CI</i>     | <i>P Value</i> |
|------------------------------------------------|-----------------------------------------------------------------------------------------|-------------|-------------------|----------------|
| <i>Multivariate</i>                            | <b>Eccentric hamstring strength asymmetry above 15%</b>                                 | <b>3.88</b> | <b>1.13-13.23</b> | <b>0.030</b>   |
|                                                | <b>Functional leg length asymmetries (1SD above/below mean right - left)</b>            | <b>3.8</b>  | <b>1.08-13.33</b> | <b>0.030</b>   |
|                                                | <b>Previous hamstring strain</b>                                                        | <b>0.15</b> | <b>0.029-0.79</b> | <b>0.020</b>   |
|                                                | Age (years)                                                                             | no data     | no data           | no data        |
|                                                | Weight (kg)                                                                             | no data     | no data           | no data        |
|                                                | Height (cm)                                                                             | no data     | no data           | no data        |
|                                                | Mid thigh girth (cm)                                                                    | no data     | no data           | no data        |
|                                                | Lower limb functional length (cm)                                                       | no data     | no data           | no data        |
|                                                | Isokinetic strength (concentric and eccentric) of ankle plantarflexors and dorsiflexors | no data     | no data           | no data        |
|                                                |                                                                                         | no data     | no data           | no data        |
|                                                | Isokinetic strength (concentric and eccentric) of knee flexors and extensors            | no data     | no data           | no data        |
|                                                |                                                                                         | no data     | no data           | no data        |
|                                                | Functional knee strength ratio ( eccentric knee flexors: concentric knee extensors)     | no data     | no data           | no data        |
|                                                |                                                                                         | no data     | no data           | no data        |
|                                                | Ankle plantarflexor flexibility(degrees)                                                | no data     | no data           | no data        |
| Hamstring and quadriceps flexibility (degrees) | no data                                                                                 | no data     | no data           |                |
|                                                | no data                                                                                 | no data     | no data           |                |

|                                               |         |         |         |
|-----------------------------------------------|---------|---------|---------|
| Proprioception with kinaesthetic stabilometer | no data | no data | no data |
|                                               | no data | no data | no data |
| Knee joint anterior stability/laxity (mm)     | no data | no data | no data |
| Questionnaire for medical history             | no data | no data | no data |

Key: OR=odds ratio, CI=confidence interval, BMI=body mass index, ROM=range of movement, cm=centimetres, mm=millimetres. Prognostic factors in **bold** denote statistical significance.

*Outcome: Quadriceps strain muscle injury*

| <i>Analysis type</i> | <i>Prognostic factors</i>                                                               | <i>OR</i> | <i>95% CI</i> | <i>P Value</i> |
|----------------------|-----------------------------------------------------------------------------------------|-----------|---------------|----------------|
| <i>Multivariate</i>  | Eccentric quadriceps strength asymmetry above 15%                                       | 5.02      | 0.928-27.14   | 0.060          |
|                      | Weight (above median)                                                                   | 10.7      | 0.73-156.37   | 0.080          |
|                      | Height (below median)                                                                   | 0.08      | 0.00-1.35     | 0.080          |
|                      | Quadriceps flexibility asymmetry (greater/equal to 6 degrees)                           | 4.98      | 0.78-31.80    | 0.080          |
|                      | Age (years)                                                                             | no data   | no data       | no data        |
|                      | Height (cm)                                                                             | no data   | no data       | no data        |
|                      | Mid-thigh girth (cm)                                                                    | no data   | no data       | no data        |
|                      | Lower limb functional length (cm)                                                       | no data   | no data       | no data        |
|                      | Isokinetic strength (concentric and eccentric) of ankle plantarflexors and dorsiflexors | no data   | no data       | no data        |
|                      |                                                                                         | no data   | no data       | no data        |
|                      | Isokinetic strength (concentric and eccentric) of knee flexors and extensors            | no data   | no data       | no data        |
|                      |                                                                                         | no data   | no data       | no data        |
|                      | Functional knee strength ratio (eccentric knee flexors:concentric knee extensors)       | no data   | no data       | no data        |
|                      |                                                                                         | no data   | no data       | no data        |
|                      | Ankle plantarflexor flexibility(degrees)                                                | no data   | no data       | no data        |
|                      |                                                                                         | no data   | no data       | no data        |
|                      | Hamstring and quadriceps flexibility (degrees)                                          | no data   | no data       | no data        |
|                      |                                                                                         | no data   | no data       | no data        |

|                                               |         |         |         |
|-----------------------------------------------|---------|---------|---------|
| Proprioception with kinaesthetic stabilometer | no data | no data | no data |
|                                               | no data | no data | no data |
| Knee joint anterior stability/laxity (mm)     | no data | no data | no data |
| Previous muscle strain                        | no data | no data | no data |

Key: OR=odds ratio, CI=confidence interval, BMI=body mass index, ROM=range of movement, cm=centimetres, mm=millimetres. Prognostic factors in **bold** denote statistical significance

**Fousekis et al<sup>35</sup>**

*Outcome: ankle sprain*

| <i>Analysis type</i> | <i>Prognostic factors</i>                           | <i>OR</i>   | <i>95% CI</i>     | <i>P Value</i> |
|----------------------|-----------------------------------------------------|-------------|-------------------|----------------|
| <i>Multivariate</i>  | <b>Eccentric ankle strength asymmetry above 15%</b> | <b>8.88</b> | <b>1.95-40.36</b> | <b>0.005</b>   |
|                      | <b>BMI above median values (23.1)</b>               | <b>8.16</b> | <b>1.42-46.63</b> | <b>0.018</b>   |
|                      | <b>Weight (kg) above median values (72.6kg)</b>     | <b>5.72</b> | <b>1.37-23.95</b> | <b>0.017</b>   |
|                      | Age below median values (<23.9yrs)                  | 0.28        | 0.061-1.24        | 0.092          |
|                      | Ankle laxity Present                                | 3.38        | 0.82-14.00        | 0.093          |
|                      | Leg dominance                                       | no data     | no data           | no data        |
|                      | Ankle ROM (degrees)                                 | no data     | no data           | no data        |
|                      | Proprioception with kinaesthetic stabilometer       | no data     | no data           | no data        |
|                      | lower limb length (cm)                              | no data     | no data           | no data        |
|                      | tibia length (cm)                                   | no data     | no data           | no data        |
|                      | Questionnaire for medical history                   | no data     | no data           | no data        |

Key: OR=odds ratio, CI=confidence interval, BMI=body mass index, ROM=range of movement, cm=centimetres, mm=millimetres. Prognostic factors in **bold** denote statistical significance.



**Hagglund et al**<sup>36</sup>  
 Outcome: All injuries

| <i>Analysis type</i> | <i>Prognostic factors</i>                     | <i>HR</i>   | <i>95% CI</i>   | <i>P Value</i>    |
|----------------------|-----------------------------------------------|-------------|-----------------|-------------------|
| <i>Univariate</i>    | <i>Prognostic factors as categorical data</i> |             |                 |                   |
|                      | <b>Previous injury</b>                        | <b>2.70</b> | <b>1.7-4.30</b> | <b>&lt;0.0001</b> |
|                      | <b>1-2 previous injuries</b>                  | <b>2.20</b> | <b>1.4-3.6</b>  | <b>0.0013</b>     |
|                      | <b>3-4 previous injuries</b>                  | <b>3</b>    | <b>1.7-5.3</b>  | <b>&lt;0.0001</b> |
|                      | <b>≥ 5 previous injuries</b>                  | <b>5.10</b> | <b>2.9-9.0</b>  | <b>&lt;0.0001</b> |
|                      | Age > 1SD below mean (≤21 years)              | 1.20        | 0.8-1.8         | 0.3800            |
|                      | Age > 1SD above mean (≥31 years)              | 1.20        | 0.8-1.9         | 0.3600            |
|                      | Height >1SD below mean (≤176cm)               | 0.80        | 0.5-1.2         | 0.2700            |
|                      | Height > 1SD above mean (≥188cm)              | 0.70        | 0.5-1.2         | 0.2100            |
|                      | Weight > 1SD below mean (≤72kg)               | 0.80        | 0.5-1.2         | 0.2700            |
|                      | Weight > 1 SD above mean (≥86kg)              | 0.90        | 0.6-1.4         | 0.7400            |
|                      | BMI >1SD below mean (≤22 kg/m <sup>2</sup> )  | 1.00        | 0.7-1.5         | 0.9600            |
|                      | BMI >1SD above mean (≥26kg/m <sup>2</sup> )   | 1.30        | 0.8-1.9         | 0.2900            |
|                      | <i>Prognostic factors as continuous data</i>  |             |                 |                   |
|                      | Age (years)                                   | 1.00        | 1.0-1.0         | 0.8000            |
|                      | <b>Previous injury</b>                        | <b>1.20</b> | <b>1.1-1.3</b>  | <b>&lt;0.0001</b> |
| Height (cm)          | 1.00                                          | 1-1.00      | 0.9800          |                   |
| Weight (kg)          | 1.00                                          | 1.0-1.0     | 0.5200          |                   |
| BMI                  | 1.10                                          | 0.9-1.2     | 0.2900          |                   |

| <i>Analysis type</i> | <i>Prognostic factors</i>             | <i>HR</i>   | <i>95% CI</i>  | <i>P Value</i>    |
|----------------------|---------------------------------------|-------------|----------------|-------------------|
| <i>Multivariate</i>  | <b>Previous injury (categorical)</b>  | <b>2.70</b> | <b>1.7-4.3</b> | <b>&lt;0.0001</b> |
|                      | <b>1-2 previous injuries</b>          | <b>2.20</b> | <b>1.4-3.6</b> | <b>0.0014</b>     |
|                      | <b>3-4 previous injuries</b>          | <b>3</b>    | <b>1.8-5.3</b> | <b>&lt;0.0001</b> |
|                      | <b>≥5 previous injuries</b>           | <b>5.20</b> | <b>2.9-9.0</b> | <b>&lt;0.0001</b> |
|                      | <b>Previous injuries (continuous)</b> | <b>1.20</b> | <b>1.1-1.3</b> | <b>&lt;0.0001</b> |

Key: HR = hazard ratio, CI=confidence interval, SD=standard deviation, kg/m<sup>2</sup> = kilograms per square metre, BMI=body mass index, kg=kilograms, cm=centimetres. Prognostic factors in **bold** denote statistical significance.

Outcome: Hamstring injury

| <i>Analysis type</i> | <i>Prognostic factors</i> | <i>HR</i>   | <i>95% CI</i>  | <i>P Value</i>   |
|----------------------|---------------------------|-------------|----------------|------------------|
| <i>Univariate</i>    | <b>Previous injury</b>    | <b>3.20</b> | <b>1.8-6.0</b> | <b>&lt;0.001</b> |
|                      | <b>Age (years)</b>        | <b>1.10</b> | <b>1.0-1.2</b> | <b>0.0210</b>    |

| <i>Analysis type</i> | <i>Prognostic factors</i> | <i>HR</i>   | <i>95% CI</i>  | <i>P Value</i>    |
|----------------------|---------------------------|-------------|----------------|-------------------|
| <i>Multivariate</i>  | <b>Previous injury</b>    | <b>3.50</b> | <b>1.9-6.5</b> | <b>&lt;0.0001</b> |
|                      | <b>Age (years)</b>        | <b>1.10</b> | <b>1.0-1.2</b> | <b>0.0110</b>     |

Key: HR= Hazard ratio, CI=confidence interval. Prognostic factors in **bold** denote statistical significance.

Outcome: Groin injury

| <i>Analysis type</i> | <i>Prognostic factors</i> | <i>HR</i>   | <i>95% CI</i>  | <i>P Value</i>  |
|----------------------|---------------------------|-------------|----------------|-----------------|
| <i>Univariate</i>    | <b>Previous Injury</b>    | <b>2.40</b> | <b>1.2-4.6</b> | <b>&lt;0.01</b> |

| <i>Analysis type</i> | <i>Prognostic factors</i> | <i>HR</i>      | <i>95% CI</i>  | <i>P Value</i> |
|----------------------|---------------------------|----------------|----------------|----------------|
| <i>Multivariate</i>  | <b>Previous Injury</b>    | <b>no data</b> | <b>no data</b> | <b>no data</b> |

Key: HR= Hazard ratio, CI=confidence interval. Prognostic factors in **bold** denote statistical significance.

Outcome: knee joint trauma

| <i>Analysis type</i> | <i>Prognostic factors</i> | <i>HR</i> | <i>95% CI</i> | <i>P Value</i> |
|----------------------|---------------------------|-----------|---------------|----------------|
| <i>Univariate</i>    | Previous Injury           | 3.10      | 1.3-7.6       | 0.0110         |
|                      | Height (cm)               | 1.05      | 1.0-1.1       | 0.1300         |

| <i>Analysis type</i> | <i>Prognostic factors</i> | <i>HR</i>   | <i>95% CI</i>  | <i>P Value</i> |
|----------------------|---------------------------|-------------|----------------|----------------|
| <i>Multivariate</i>  | <b>Previous Injury</b>    | <b>3.10</b> | <b>1.3-7.6</b> | <b>0.0110</b>  |
|                      | Height (cm)               | 1.05        | 1.0-1.1        | 0.1300         |

Key: HR= Hazard ratio, CI=Confidence interval, cm=centimetres, kg=kilograms. Prognostic factors in **bold** denote statistical significance.

Outcome: ankle sprain injury

| <i>Analysis type</i> | <i>Prognostic factors</i> | <i>HR</i> | <i>95% CI</i> | <i>P Value</i> |
|----------------------|---------------------------|-----------|---------------|----------------|
| <i>Univariate</i>    | Previous injury           | 2.80      | 0.8-9.6       | 0.0990         |
|                      | Age (years)               | 0.90      | 0.8-1.0       | 0.1200         |
|                      | Height (cm)               | 1.10      | 1.0-1.2       | 0.1600         |
|                      | Weight (kg)               | 1.10      | 1.0-1.2       | 0.0910         |

| <i>Analysis type</i> | <i>Prognostic factors</i> | <i>HR</i> | <i>95% CI</i> | <i>P Value</i> |
|----------------------|---------------------------|-----------|---------------|----------------|
| <i>Multivariate</i>  | Previous injury           | 3.00      | 0.9-10.4      | 0.0790         |
|                      | Age (years)               | 0.90      | 0.8-1.0       | 0.0610         |
|                      | Height (cm)               | 1.00      | 0.9-1.1       | 0.8900         |
|                      | Weight (kg)               | 1.10      | 1-1.2         | 0.1900         |

Key: HR= Hazard ratio, CI=Confidence interval, cm=centimetres, kg=kilograms. Prognostic factors in **bold** denote statistical significance.

**Hagglund et al<sup>37</sup>**

Outcome: Adductor muscle injury

| <i>Analysis type</i> | <i>Intrinsic Prognostic factor</i>  | <i>HR</i>   | <i>95% CI</i>    | <i>P Value</i> |
|----------------------|-------------------------------------|-------------|------------------|----------------|
| <i>Univariate</i>    | Age (above mean)                    | 1.24        | 0.96-1.59        | 0.094          |
|                      | Stature (above mean)                | 0.97        | 0.75-1.24        | 0.792          |
|                      | Body mass (above mean)              | 1.08        | 0.84-1.38        | 0.559          |
|                      | <i>Position</i>                     |             |                  |                |
|                      | <b>Goalkeeper</b>                   | <b>0.58</b> | <b>0.33-0.99</b> | <b>0.048</b>   |
|                      | Defender                            | 1.19        | 0.83-1.70        | 0.345          |
|                      | Midfielder                          | 1.10        | 0.77-1.58        | 0.591          |
|                      | Forward                             | 1.00        | No data          | no data        |
|                      | <i>Previous injury</i>              |             |                  |                |
|                      | <b>Adductor</b>                     | <b>1.48</b> | <b>1.06-2.06</b> | <b>0.020</b>   |
|                      | Hamstrings                          | 1.25        | 0.04-1.68        | 0.131          |
|                      | Quadriceps                          | 1.31        | 0.89-1.91        | 0.170          |
|                      | Calf                                | 1.01        | 0.63-1.64        | 0.959          |
|                      |                                     |             |                  |                |
|                      | <i>Extrinsic prognostic factors</i> | <i>OR</i>   | <i>95% CI</i>    | <i>P Value</i> |
|                      | <i>Match type</i>                   |             |                  |                |

|                       |             |                  |                  |
|-----------------------|-------------|------------------|------------------|
| League                | 1.00        | no data          | no data          |
| UEFA CL               | 1.17        | 0.83-1.64        | 0.374            |
| UEFA Europa           | 1.05        | 0.59-1.87        | 0.865            |
| <b>Other Cup</b>      | <b>0.60</b> | <b>0.37-0.97</b> | <b>0.035</b>     |
| <i>Match venue</i>    |             |                  |                  |
| home                  | 1.00        | no data          | no data          |
| <b>Away</b>           | <b>0.56</b> | <b>0.43-0.73</b> | <b>&lt;0.001</b> |
| <i>Part of Season</i> |             |                  |                  |
| July- August          | 1.00        | no data          | no data          |
| September-November    | 1.39        | 0.81-2.38        | 0.237            |
| December-February     | 1.13        | 0.65-1.96        | 0.660            |
| March-May             | 1.43        | 0.83-2.47        | 0.201            |
| <i>Climate Region</i> |             |                  |                  |
| Northern              | 1.00        | no data          | no data          |
| Southern              | 1.04        | 0.77-1.40        | 0.803            |

| <i>Analysis type</i> | <i>Intrinsic prognostic factors</i> | <i>HR</i>   | <i>95% CI</i>    | <i>P Value</i>   |
|----------------------|-------------------------------------|-------------|------------------|------------------|
| <i>Multivariate</i>  | <b>Previous adductor injury</b>     | <b>1.40</b> | <b>1.00-1.96</b> | <b>0.047</b>     |
|                      | <b>Goalkeeper</b>                   | <b>0.51</b> | <b>0.29-0.91</b> | <b>0.022</b>     |
|                      | <i>Extrinsic prognostic factors</i> | <i>OR</i>   | <i>95% CI</i>    | <i>P Value</i>   |
|                      | <b>Away match</b>                   | <b>0.56</b> | <b>0.43-0.73</b> | <b>&lt;0.001</b> |

Key: HR= Hazard ratio, OR= odds ratio, UEFA= Union of European Football Associations, CL= Champions League. Prognostic factors in **bold** denote statistical significance.

*Outcome: Hamstring muscle strain injury*

| <i>Analysis type</i> | <i>Intrinsic Prognostic factor</i> | <i>HR</i>   | <i>95% CI</i>    | <i>P Value</i>   |
|----------------------|------------------------------------|-------------|------------------|------------------|
| <i>Univariate</i>    | Age (above mean)                   | 1.02        | 0.84-1.23        | 0.881            |
|                      | <b>Stature (above mean)</b>        | <b>0.82</b> | <b>0.68-1.00</b> | <b>0.049</b>     |
|                      | Body mass (above mean)             | 0.87        | 0.72-1.06        | 0.169            |
|                      | <i>Position</i>                    |             |                  |                  |
|                      | <b>Goalkeeper</b>                  | <b>0.11</b> | <b>0.06-0.23</b> | <b>&lt;0.001</b> |
|                      | Defender                           | 0.80        | 0.61-1.04        | 0.094            |
|                      | Midfielder                         | 0.97        | 0.75-1.25        | 0.792            |
|                      | Forward                            | 1.00        | no data          | no data          |
|                      | <i>Previous injury</i>             |             |                  |                  |
|                      | Adductor                           | 1.22        | Adductor         | 2.22             |
|                      | <b>Hamstrings</b>                  | <b>1.64</b> | <b>1.32-2.04</b> | <b>&lt;0.001</b> |

|                                     |                           |             |                  |                  |
|-------------------------------------|---------------------------|-------------|------------------|------------------|
|                                     | <b>Quadriceps</b>         | <b>1.44</b> | <b>1.08-1.93</b> | <b>0.014</b>     |
|                                     | Calf                      | 1.40        | 1.00-1.95        | 0.050            |
| <i>Extrinsic prognostic factors</i> |                           |             |                  |                  |
|                                     | <i>Match type</i>         | <i>OR</i>   | <i>95% CI</i>    | <i>P Value</i>   |
|                                     | League                    | 1.00        | no data          | no data          |
|                                     | UEFA CL                   | 1.05        | 0.81-1.37        | 0.703            |
|                                     | UEFA Europa               | 0.72        | 0.43-1.18        | 0.190            |
|                                     | Other Cup                 | 0.77        | 0.56-1.06        | 0.106            |
|                                     | <i>Match venue</i>        |             |                  |                  |
|                                     | home                      | 1.00        | no data          | no data          |
|                                     | <b>Away</b>               | <b>0.75</b> | <b>0.62-0.91</b> | <b>0.003</b>     |
|                                     | <i>Part of Season</i>     |             |                  |                  |
|                                     | July- August              | 1.00        | no data          | no data          |
|                                     | <b>September-November</b> | <b>2.24</b> | <b>1.34-3.74</b> | <b>0.002</b>     |
|                                     | <b>December-February</b>  | <b>2.56</b> | <b>1.54-4.26</b> | <b>&lt;0.001</b> |
|                                     | <b>March-May</b>          | <b>2.56</b> | <b>1.54-4.28</b> | <b>&lt;0.001</b> |
|                                     | <i>Climate Region</i>     |             |                  |                  |
|                                     | Northern                  | 1.00        | no data          | no data          |
|                                     | Southern                  | 1.08        | 0.87-1.35        | 0.474            |

|                                     |                                     |             |                  |                  |
|-------------------------------------|-------------------------------------|-------------|------------------|------------------|
|                                     | <i>Intrinsic prognostic factors</i> | <i>HR</i>   | <i>95% CI</i>    | <i>P Value</i>   |
| <i>Multivariate</i>                 | <b>Previous hamstring injury</b>    | <b>1.40</b> | <b>1.12-1.75</b> | <b>0.003</b>     |
|                                     | <b>Goalkeeper</b>                   | <b>0.11</b> | <b>0.06-0.24</b> | <b>&lt;0.001</b> |
| <i>Extrinsic prognostic factors</i> |                                     |             |                  |                  |
|                                     | <i>Time of season</i>               |             |                  |                  |
|                                     | <b>Away match</b>                   | <b>0.76</b> | <b>0.63-0.92</b> | <b>0.004</b>     |
|                                     | <b>September-November</b>           | <b>2.16</b> | <b>1.29-3.60</b> | <b>0.003</b>     |
|                                     | <b>December-february</b>            | <b>2.55</b> | <b>1.53-4.24</b> | <b>&lt;0.001</b> |
|                                     | <b>March-May</b>                    | <b>2.49</b> | <b>1.49-4.17</b> | <b>&lt;0.001</b> |

Key: HR= Hazard ratio, OR= odds ratio, UEFA= Union of European Football Associations, CL= Champions League. Prognostic factors in **bold** denote statistical significance.

*Outcome: Quadriceps muscle strain injury*

|                      |                                     |           |               |                |
|----------------------|-------------------------------------|-----------|---------------|----------------|
| <i>Analysis type</i> | <i>Intrinsic prognostic factors</i> | <i>HR</i> | <i>95% CI</i> | <i>P Value</i> |
| <i>Univariate</i>    | Age (above mean)                    | 1.06      | 0.79-1.41     | 0.71           |
|                      | Stature (above mean)                | 0.88      | 0.66-1.17     | 0.367          |
|                      | Body mass (above mean)              | 0.91      | 0.68-1.21     | 0.5            |

|                        |                                     |             |                  |                  |
|------------------------|-------------------------------------|-------------|------------------|------------------|
| <i>Position</i>        |                                     |             |                  |                  |
|                        | Goalkeeper                          | 0.46        | 0.23-0.90        | 0.23             |
|                        | Defender                            | 0.95        | 0.62-1.43        | 0.791            |
|                        | Midfielder                          | 1.18        | 0.62-1.43        | 0.418            |
|                        | Forward                             | 1           | no data          | no data          |
| <i>Previous injury</i> |                                     |             |                  |                  |
|                        | <b>Adductor</b>                     | <b>1.88</b> | <b>1.31-2.69</b> | <b>0.001</b>     |
|                        | Hamstrings                          | 1.25        | 0.89-1.76        | 0.202            |
|                        | <b>Quadriceps</b>                   | <b>3.47</b> | <b>2.49-4.84</b> | <b>&lt;0.001</b> |
|                        | <b>Calf</b>                         | <b>2.08</b> | <b>1.37-3.17</b> | <b>0.001</b>     |
| <hr/>                  |                                     |             |                  |                  |
|                        | <i>Extrinsic prognostic factors</i> | <i>OR</i>   | <i>95% CI</i>    | <i>P Value</i>   |
| <i>Match type</i>      |                                     |             |                  |                  |
|                        | League                              | 1           | no data          | no data          |
|                        | UEFA CL                             | 0.51        | 0.25-1.01        | 0.053            |
|                        | UEFA Europa                         | 1.19        | 0.55-2.60        | 0.656            |
|                        | Other Cup                           | 1.36        | 0.83-2.22        | 0.227            |
| <i>Match venue</i>     |                                     |             |                  |                  |
|                        | home                                | 1           | no data          | no data          |
|                        | Away                                | 1.02        | 0.71-1.47        | 0.901            |
| <i>Part of Season</i>  |                                     |             |                  |                  |
|                        | July- August                        | 1           | no data          | no data          |
|                        | September-November                  | 0.97        | 0.50-1.90        | 0.936            |
|                        | December-February                   | 0.95        | 0.48-1.85        | 0.87             |
|                        | March-May                           | 0.67        | 0.33-1.37        | 0.27             |
| <i>Climate Region</i>  |                                     |             |                  |                  |
|                        | Northern                            | 1           | no data          | no data          |
|                        | Southern                            | 0.87        | 0.55-1.36        | 0.528            |
| <hr/>                  |                                     |             |                  |                  |
|                        | <i>Intrinsic prognostic factors</i> | <i>HR</i>   | <i>95% CI</i>    | <i>P Value</i>   |
| <i>Multivariate</i>    | <b>Previous quadriceps injury</b>   | <b>3.1</b>  | <b>2.21-4.36</b> | <b>&lt;0.001</b> |
|                        | <b>Previous adductor injury</b>     | <b>1.68</b> | <b>1.16-2.41</b> | <b>0.006</b>     |
|                        | <b>Previous calf injury</b>         | <b>1.91</b> | <b>1.24-2.93</b> | <b>0.003</b>     |
|                        | <b>Goalkeeper</b>                   | <b>0.41</b> | <b>0.20-0.82</b> | <b>0.012</b>     |
|                        |                                     |             |                  |                  |
| <hr/>                  |                                     |             |                  |                  |
|                        | <i>Extrinsic prognostic factors</i> | <i>OR</i>   | <i>95% CI</i>    | <i>P Value</i>   |
|                        | <b>UEFA CL match</b>                | <b>0.48</b> | <b>0.24-0.97</b> | <b>0.04</b>      |

Key: HR= Hazard ratio, OR= odds ratio, UEFA= Union of European Football Associations, CL= Champions League. Prognostic factors in **bold** denote statistical significance.

Outcome: calf muscle injury

| <i>Analysis type</i>  | <i>Intrinsic prognostic factors</i> | <i>HR</i>   | <i>95% CI</i>    | <i>P Value</i>   |
|-----------------------|-------------------------------------|-------------|------------------|------------------|
| <i>Univariate</i>     | <i>Demographic factors:</i>         |             |                  |                  |
|                       | <b>Age (above mean)</b>             | <b>2.02</b> | <b>1.45-2.82</b> | <b>&lt;0.001</b> |
|                       | Stature (above mean)                | 1.04        | 0.76-1.43        | 0.819            |
|                       | Body mass (above mean)              | 1.19        | 0.87-1.64        | 0.282            |
|                       | <i>Position</i>                     |             |                  |                  |
|                       | <b>Goalkeeper</b>                   | <b>0.43</b> | <b>0.20-0.96</b> | <b>0.038</b>     |
|                       | Defender                            | 1.31        | 0.83-2.07        | 0.242            |
|                       | Midfielder                          | 1.16        | 0.73-1.85        | 0.524            |
|                       | Forward                             | 1           | no data          | no data          |
|                       | <i>Previous injury</i>              |             |                  |                  |
|                       | <b>Adductor</b>                     | <b>1.87</b> | <b>1.26-2.77</b> | <b>0.002</b>     |
|                       | <b>Hamstrings</b>                   | <b>2.1</b>  | <b>1.51-2.54</b> | <b>&lt;0.001</b> |
|                       | Quadriceps                          | 1.09        | 0.65-1.83        | 0.742            |
|                       | <b>Calf</b>                         | <b>2.83</b> | <b>1.86-4.31</b> | <b>&lt;0.001</b> |
|                       | <i>Extrinsic prognostic factors</i> |             |                  |                  |
|                       | <i>Match type</i>                   |             |                  |                  |
|                       | League                              | 1           | no data          | no data          |
|                       | <b>UEFA CL</b>                      | <b>2.43</b> | <b>1.61-3.67</b> | <b>&lt;0.001</b> |
|                       | UEFA Europa                         | 1.23        | 0.53-2.84        | 0.636            |
|                       | Other Cup                           | 0.89        | 0.47-1.68        | 0.708            |
|                       | <i>Match venue</i>                  |             |                  |                  |
|                       | home                                | 1           | no data          | no data          |
|                       | Away                                | 0.9         | 0.63-1.28        | 0.544            |
|                       | <i>Part of Season</i>               |             |                  |                  |
|                       | July- August                        | 1           | no data          | no data          |
|                       | September-November                  | 0.88        | 0.42-1.86        | 0.745            |
|                       | December-February                   | 1.13        | 0.55-2.35        | 0.74             |
| March-May             | 1.34                                | 0.65-2.77   | 0.429            |                  |
| <i>Climate Region</i> |                                     |             |                  |                  |
| Northern              | 1                                   | no data     | no data          |                  |
| Southern              | 0.89                                | 0.57-1.39   | 0.614            |                  |
| <i>Analysis type</i>  | <i>Intrinsic prognostic factors</i> | <i>HR</i>   | <i>95% CI</i>    | <i>P Value</i>   |
| <i>Multivariate</i>   | <b>Previous calf injury</b>         | <b>2.33</b> | <b>1.52-3.57</b> | <b>&lt;0.001</b> |
|                       | <b>Previous adductor injury</b>     | <b>1.71</b> | <b>1.15-2.55</b> | <b>0.008</b>     |
|                       | <b>Previous hamstring injury</b>    | <b>1.74</b> | <b>1.24-2.44</b> | <b>0.002</b>     |
|                       | <b>Goalkeeper</b>                   | <b>0.36</b> | <b>0.16-0.82</b> | <b>0.015</b>     |

|                                     |             |                  |                  |
|-------------------------------------|-------------|------------------|------------------|
| <b>Older age (age above mean)</b>   | <b>1.93</b> | <b>1.38-2.71</b> | <b>&lt;0.001</b> |
| <i>Extrinsic prognostic factors</i> | <i>OR</i>   | <i>95% CI</i>    | <i>P Value</i>   |
| <b>UEFA Champions league match</b>  | <b>2.72</b> | <b>1.78-4.14</b> | <b>&lt;0.001</b> |

Key: HR= Hazard ratio, OR= odds ratio, UEFA= Union of European Football Associations, CL= Champions League. Prognostic factors in **bold** denote statistical significance.

### Hagglund et al<sup>38</sup>

Outcome: Patellar tendinopathy

| <i>Analysis type</i>              | <i>Prognostic factors</i>                                                   | <i>OR</i>           | <i>95% CI</i>       | <i>P Value</i>      |
|-----------------------------------|-----------------------------------------------------------------------------|---------------------|---------------------|---------------------|
| Univariate                        | <b>Total exposure hours (only significant factor)</b>                       | <b>Not reported</b> | <b>Not reported</b> | <b>Not reported</b> |
|                                   | <b>All other factors not reported as supplementary material unavailable</b> |                     |                     |                     |
| Multivariate                      | <b>Total exposure hours (per 10 hour increase)</b>                          | <b>1.02</b>         | <b>1-1.04</b>       | <b>0.033</b>        |
|                                   | <b>Body weight (per 5kg increase)</b>                                       | <b>1.15</b>         | <b>1-1.33</b>       | <b>0.055</b>        |
|                                   | <b>Age</b>                                                                  | <b>0.97</b>         | <b>0.93-1.01</b>    | <b>0.17</b>         |
| (Note: P values accepted at 0.20) |                                                                             |                     |                     |                     |

### Henderson et al<sup>39</sup>

Outcome: Hamstring injury in dominant leg

| <i>Analysis type</i> | <i>Prognostic factors</i>              | <i>OR</i>   | <i>95% CI</i>    | <i>P Value</i> |
|----------------------|----------------------------------------|-------------|------------------|----------------|
| Multivariate         | <b>Age</b>                             | <b>1.78</b> | <b>1.17-2.72</b> | <b>0.007</b>   |
|                      | <b>Active hip flexion (dominant)</b>   | <b>0.77</b> | <b>0.62-0.97</b> | <b>0.023</b>   |
|                      | <b>Non countermovement jump height</b> | <b>1.47</b> | <b>1.02-2.12</b> | <b>0.038</b>   |
|                      | <b>Lean mass</b>                       | <b>0.84</b> | <b>0.71-1.01</b> | <b>0.06</b>    |



**Nilstad et al<sup>40</sup>**

Outcome: Lower extremity injury

| <i>Analysis type</i>     | <i>Prognostic factor</i>      | <i>OR</i>                | <i>95% CI</i>    | <i>p value</i> |
|--------------------------|-------------------------------|--------------------------|------------------|----------------|
| <i>Univariate</i>        | <i>Previous injury:</i>       |                          |                  |                |
|                          | ACL Injury                    | 1.97                     | 0.77-5.05        | 0.16           |
|                          | Knee injury                   | 0.92                     | 0.44-1.91        | 0.820          |
|                          | Ankle injury                  | 1.28                     | 0.81-2.01        | 0.290          |
|                          | Hamstring injury              | 0.86                     | 0.44-1.66        | 0.640          |
|                          | <i>Neuromuscular factors:</i> |                          |                  |                |
|                          | Quadriceps strength           | 1.01                     | 0.81-1.26        | 0.950          |
|                          | Hamstring strength            | 1.15                     | 0.91-1.46        | 0.230          |
|                          | Hip abductor strength         | 0.89                     | 0.71-1.12        | 0.320          |
|                          | 1 RM leg press                | 1.08                     | 0.86-1.35        | <b>0.530</b>   |
|                          | Star excursion balance test   | 1.07                     | 0.88-1.31        | 0.490          |
|                          | Knee valgus angle             | 0.83                     | 0.67-1.02        | 0.080          |
|                          | <i>Anatomic factors:</i>      |                          |                  |                |
|                          | Knee joint laxity             | 1.1                      | 0.94-1.29        | 0.24           |
|                          | <b>Foot pronation</b>         | <b>1.23</b>              | <b>1-1.51</b>    | <b>0.05</b>    |
|                          | Generalised joint laxity      | 0.82                     | 0.47-1.44        | 0.49           |
|                          | <i>Analysis type</i>          | <i>Prognostic factor</i> | <i>OR</i>        | <i>95% CI</i>  |
| <i>Multivariate</i>      | <i>Demographic factors:</i>   |                          |                  |                |
|                          | Age                           | 1.24                     | 1-1.54           | 0.09           |
|                          | <b>BMI</b>                    | <b>1.51</b>              | <b>1.21-1.90</b> | <b>0.001</b>   |
|                          | <i>Previous injury:</i>       |                          |                  |                |
|                          | ACL Injury                    | 1.55                     | 0.42-5.68        | 0.51           |
|                          | <i>Neuromuscular factors:</i> |                          |                  |                |
|                          | Knee valgus angle             | 0.9                      | 0.71-1.15        | 0.460          |
| <i>Anatomic factors:</i> |                               |                          |                  |                |
| Foot pronation           | 1.25                          | 0.99-1.59                | 0.06             |                |

Key: BMI= Body mass index, RM=Repetition maximum, ACL = anterior cruciate ligament, OR=odds ratio, CI= Confidence interval. Prognostic factors in **bold** denote statistical significance.

Outcome: thigh injuries

| <i>Analysis type</i>          | <i>Prognostic factor</i>      | <i>OR</i>   | <i>95% CI</i>    | <i>p value</i> |
|-------------------------------|-------------------------------|-------------|------------------|----------------|
| Univariate                    | <i>Demographic factors:</i>   |             |                  |                |
|                               | Age                           | 0.98        | 0.7-1.38         | 0.9            |
|                               | BMI                           | 1.37        | 0.95-1.98        | 0.090          |
|                               | <i>Previous injury:</i>       |             |                  |                |
|                               | ACL Injury                    | No data     | No data          | No data        |
|                               | Knee injury                   | No data     | No data          | No data        |
|                               | Ankle injury                  | No data     | No data          | No data        |
|                               | Hamstring injury              | 0.86        | 0.44-1.66        | 0.640          |
|                               | <i>Neuromuscular factors:</i> |             |                  |                |
|                               | Quadiceps strength            | 1.1         | 0.72-1.66        | 0.660          |
|                               | Hamstring strength            | 1.38        | 0.86-2.23        | 0.180          |
|                               | Hip abductor strength         | 0.99        | 0.65-1.51        | 0.170          |
|                               | 1 RM leg press                | 1.32        | 0.87-2           | 0.190          |
|                               | Star excursion balance test   | 0.88        | 0.62-1.25        | 0.48           |
|                               | <i>Anatomic factors:</i>      |             |                  |                |
|                               | Knee joint laxity             | 1.16        | 0.93-1.44        | 0.19           |
| Foot pronation                | 1.13                          | 0.77-1.66   | 0.54             |                |
| Generalised joint laxity      | 1.14                          | 0.44-2.99   | 0.79             |                |
|                               | <i>Prognostic factor</i>      | <i>OR</i>   | <i>95% CI</i>    | <i>p value</i> |
| Multivariate                  | <i>Demographic factors:</i>   |             |                  |                |
|                               | <b>BMI</b>                    | <b>1.51</b> | <b>1.08-2.11</b> | <b>0.010</b>   |
|                               | <i>Previous injury:</i>       |             |                  |                |
|                               | Hamstring injury              | 1.35        | 0.42-4.38        | 0.62           |
| <i>Neuromuscular factors:</i> |                               |             |                  |                |
|                               | Hamstring strength            | 1.45        | 0.98-2.16        | 0.060          |

Key: BMI= Body mass index, RM=Repetition maximum, ACL = anterior cruciate ligament, OR=odds ratio, CI= Confidence interval. Prognostic factors in **bold** denote statistical significance.

Outcome: knee injuries

| <i>Analysis type</i>     | <i>Prognostic factor</i>      | <i>OR</i>  | <i>95% CI</i>    | <i>p value</i> |
|--------------------------|-------------------------------|------------|------------------|----------------|
| <i>Univariate</i>        | <i>Demographic factors:</i>   |            |                  |                |
|                          | Age                           | 1.2        | 0.91-1.58        | 0.19           |
|                          | BMI                           | 1.1        | 0.85-1.42        | 0.460          |
|                          | <i>Previous injury:</i>       |            |                  |                |
|                          | <b>ACL Injury</b>             | <b>3.7</b> | <b>1.47-9.36</b> | <b>0.010</b>   |
|                          | Knee injury                   | 0.67       | 0.19-2.40        | 0.540          |
|                          | <i>Neuromuscular factors:</i> |            |                  |                |
|                          | Quadriceps strength           | 0.87       | 0.62-1.23        | 0.430          |
|                          | Hamstring strength            | 0.84       | 0.60-1.19        | 0.320          |
|                          | Hip abductor strength         | 0.89       | 0.64-1.23        | 0.470          |
|                          | 1 RM leg press                | 0.9        | 0.65-1.25        | 0.530          |
|                          | Star excursion balance test   | 0.93       | 0.7-1.23         | 0.6            |
|                          | Knee valgus angle             | 0.8        | 0.59-1.08        | 0.14           |
|                          | <i>Anatomic factors:</i>      |            |                  |                |
|                          | Knee joint laxity             | 1.17       | 0.95-1.43        | 0.14           |
|                          | Foot pronation                | 1.32       | 0.97-1.79        | 0.08           |
| Generalised joint laxity | 0.85                          | 0.4-1.84   | 0.69             |                |

| <i>Analysis type</i> | <i>Prognostic factor</i>      | <i>OR</i> | <i>95% CI</i> | <i>p value</i> |
|----------------------|-------------------------------|-----------|---------------|----------------|
| <i>Multivariate</i>  | <i>Previous injury:</i>       |           |               |                |
|                      | ACL Injury                    | 3.3       | 0.82-13.3     | 0.09           |
|                      | Previous ankle injury         | 1.46      | 0.64-3.31     | 0.370          |
|                      | <i>Neuromuscular factors:</i> |           |               |                |
|                      | Knee valgus angle             | 0.12      | 0.01-1.3      | 0.18           |
|                      | <i>Anatomic factors:</i>      |           |               |                |
|                      | Foot pronation                | 1.28      | 0.87-1.90     | 0.260          |
| Knee joint laxity    | 1.12                          | 0.84-1.51 | 0.47          |                |

Key: BMI= Body mass index, RM=Repetition maximum, ACL = anterior cruciate ligament, OR=odds ratio, CI= Confidence interval. Prognostic factors in **bold** denote statistical significance.

Outcome: ankle injuries

| <i>Analysis type</i> | <i>Prognostic factor</i>    | <i>OR</i>   | <i>95% CI</i>    | <i>p value</i> |
|----------------------|-----------------------------|-------------|------------------|----------------|
| <i>Univariate</i>    | <i>Demographic factors:</i> |             |                  |                |
|                      | <b>Age</b>                  | <b>0.64</b> | <b>0.44-0.95</b> | <b>0.03</b>    |
|                      | BMI                         | 1.25        | 0.90-1.72        | 0.180          |

|                               |                             |             |                  |              |
|-------------------------------|-----------------------------|-------------|------------------|--------------|
| <i>Previous injury:</i>       |                             |             |                  |              |
|                               | Knee injury                 | 0.67        | 0.15-2.91        | 0.590        |
|                               | Ankle injury                | 1.44        | 0.66-3.16        | 0.360        |
| <i>Neuromuscular factors:</i> |                             |             |                  |              |
|                               | Quadriceps strength         | 1.12        | 0.78-1.61        | 0.540        |
|                               | Hamstring strength          | 1.12        | 0.81-1.57        | 0.490        |
|                               | Hip abductor strength       | 1.11        | 0.83-1.48        | 0.470        |
|                               | <b>1 RM leg press</b>       | <b>1.47</b> | <b>1.05-2.05</b> | <b>0.020</b> |
|                               | Star excursion balance test | 0.99        | 0.71-1.39        | 0.96         |
|                               | Knee valgus angles          | 1.14        | 0.49-2.66        | 0.76         |
| <i>Anatomic factors:</i>      |                             |             |                  |              |
|                               | Knee joint laxity           | 0.98        | 0.72-1.35        | 0.92         |
|                               | <b>Foot pronation</b>       | <b>1.56</b> | <b>1.13-2.15</b> | <b>0.01</b>  |
|                               | Generalised joint laxity    | 1.14        | 0.49-2.66        | 0.76         |

| <i>Analysis type</i> | <i>Prognostic factor</i>      | <i>OR</i>                 | <i>95% CI</i> | <i>p value</i>   |              |
|----------------------|-------------------------------|---------------------------|---------------|------------------|--------------|
| <i>Multivariate</i>  | <i>Demographic factors:</i>   |                           |               |                  |              |
|                      |                               | Age                       | 0.65          | 0.4-1.05         | 0.08         |
|                      | <i>Neuromuscular factors:</i> |                           |               |                  |              |
|                      |                               | <b>Knee valgus angles</b> | <b>0.64</b>   | <b>0.41-1.00</b> | <b>0.040</b> |
|                      |                               | 1 RM leg press            | 1.41          | 0.97-2.06        | 0.07         |
|                      | <i>Anatomic factors:</i>      |                           |               |                  |              |
|                      |                               | Foot pronation            | 1.55          | 0.99-2.41        | 0.07         |

Key: BMI= Body mass index, RM=Repetition maximum, ACL = anterior cruciate ligament, OR=odds ratio, CI= Confidence interval. Prognostic factors in **bold** denote statistical significance.

*Outcome: lower leg and foot injuries*

| <i>Analysis Type</i> | <i>Prognostic factor</i>      | <i>OR</i>             | <i>95% CI</i> | <i>p value</i>   |              |
|----------------------|-------------------------------|-----------------------|---------------|------------------|--------------|
| <i>Univariate</i>    | <i>Demographic factors:</i>   |                       |               |                  |              |
|                      |                               | <b>Age</b>            | <b>1.48</b>   | <b>1-2.21</b>    | <b>0.05</b>  |
|                      |                               | BMI                   | 1.44          | 0.84-2.49        | 0.180        |
|                      | <i>Previous injury:</i>       |                       |               |                  |              |
|                      |                               | <b>Knee injury</b>    | <b>3.73</b>   | <b>1.47-9.46</b> | <b>0.010</b> |
|                      |                               | Ankle injury          | 1.01          | 0.41-2.47        | 0.990        |
|                      | <i>Neuromuscular factors:</i> |                       |               |                  |              |
|                      |                               | Quadriceps strength   | 0.85          | 0.61-1.19        | 0.340        |
|                      |                               | Hamstring strength    | 1.14          | 0.81-1.61        | 0.440        |
|                      |                               | Hip abductor strength | 0.7           | 0.42-1.17        | 0.170        |
|                      |                               | 1 RM leg press        | 0.95          | 0.59-1.52        | 0.820        |

|                             |      |           |      |
|-----------------------------|------|-----------|------|
| Star excursion balance test | 1.37 | 0.84-2.24 | 0.21 |
| knee valgus angle           | 1.04 | 0.76-1.42 | 0.81 |
| <i>Anatomic factors:</i>    |      |           |      |
| Knee joint laxity           | 0.83 | 0.58-1.19 | 0.32 |
| Foot pronation              | 1.01 | 0.91-1.11 | 0.94 |
| Generalised joint laxity    | 0.72 | 0.71-1.43 | 0.55 |

| <i>Analysis Type</i> | <i>Prognostic factor</i>    | <i>OR</i>   | <i>95% CI</i>    | <i>p value</i> |
|----------------------|-----------------------------|-------------|------------------|----------------|
| Multivariate         | <i>Demographic factors:</i> |             |                  |                |
|                      | Age                         | 1.47        | 0.98-2.2         | 0.06           |
|                      | BMI                         | 1.4         | 0.90-2.17        | 0.140          |
|                      | <i>Previous Injury</i>      |             |                  |                |
|                      | <b>Knee injury</b>          | <b>3.57</b> | <b>1.27-9.99</b> | <b>0.02</b>    |

Key: BMI= Body mass index, RM=Repetition maximum, ACL = anterior cruciate ligament, OR=odds ratio, CI= Confidence interval. Prognostic factors in **bold** denote statistical significance.

#### Timmins et al<sup>41</sup>

Outcome: Hamstring muscle injuries

| <i>Analysis type</i> | <i>Prognostic factors</i>                              | <i>Rel. R</i> | <i>95% CI</i>  | <i>P Value</i> |
|----------------------|--------------------------------------------------------|---------------|----------------|----------------|
| Univariate           | <i>Passive fascicle length</i>                         |               |                |                |
|                      | <10.56cm                                               | <b>4.1</b>    | <b>1.9-8.7</b> | <b>0.001</b>   |
|                      | <i>Passive fascicle length relative to BFlh length</i> |               |                |                |
|                      | <0.254                                                 | <b>3.7</b>    | <b>1.9-7.3</b> | <b>0.001</b>   |
|                      | <i>25% MVIC length</i>                                 |               |                |                |
|                      | <9.61                                                  | 3.2           | 1.2-7.9        | 0.008          |
|                      | <i>Passive fascicle length imbalance</i>               |               |                |                |
|                      | >10% imbalance                                         | 1.2           | 0.6-2.4        | 0.673          |
|                      | >15% imbalance                                         | 1.5           | 0.7-3.0        | 0.271          |
|                      | >20% imbalance                                         | 1.3           | 0.6-3.0        | 0.579          |
|                      | <i>25% MVIC fascicle length imbalance</i>              |               |                |                |
|                      | >10% imbalance                                         | <b>1.3</b>    | <b>0.6-2.6</b> | <b>0.512</b>   |
|                      | <15% imbalance                                         | 0.7           | 0.3-1.7        | 0.630          |
|                      | <20% imbalance                                         | 0.4           | 0.1-1.7        | 0.249          |

|                                      |            |                 |              |
|--------------------------------------|------------|-----------------|--------------|
| <i>Passive muscle thickness</i>      |            |                 |              |
| <2.35cm                              | 0.56       | 0.2-1.5         | 0.320        |
| <i>25% MVIC muscle thickness</i>     |            |                 |              |
| <2.61cm                              | 1.3        | 0.6-2.7         | 0.504        |
| <i>Eccentric hams strength</i>       |            |                 |              |
| <b>&lt;337N</b>                      | <b>4.4</b> | <b>1.1-17.5</b> | <b>0.013</b> |
| <b>&lt;145Nm</b>                     | <b>3.6</b> | <b>1.2-11.4</b> | <b>0.017</b> |
| <b>&lt;4.35N/Kg</b>                  | <b>2.5</b> | <b>1.1-6.2</b>  | <b>0.041</b> |
| <b>&lt;1.86 Nm/kg</b>                | <b>2.9</b> | <b>1.1-7.1</b>  | <b>0.011</b> |
| <i>Eccentric strength imbalance</i>  |            |                 |              |
| >10% imbalance                       | 1.0        | 0.5-2.0         | 1            |
| >15% imbalance                       | 1.3        | 0.6-2.7         | 0.459        |
| >20% imbalance                       | 1.5        | 0.6-3.8         | 0.476        |
| <i>MVIC strength</i>                 |            |                 |              |
| <400N                                | 2.0        | 0.8-5.2         | 0.161        |
| <172Nm                               | 1.5        | 0.7-3.5         | 0.364        |
| <4.60N/Kg                            | 1.5        | 0.7-3.2         | 0.254        |
| 2.07 Nm/kg                           | 1.6        | 0.8-3.3         | 0.192        |
| <i>MVIC strength imbalance</i>       |            |                 |              |
| <10% imbalance                       | 0.8        | 0.4-1.8         | 0.826        |
| >15% imbalance                       | 1.3        | 0.6-2.9         | 0.434        |
| >20% imbalance                       | 1.1        | 0.4-3.3         | 0.732        |
| <i>Previous injury</i>               |            |                 |              |
| HSI                                  | 2.0        | 1.0-4.0         | 0.063        |
| ACL                                  | 1.9        | 0.8-4.4         | 0.164        |
| Calf strain                          | 1.3        | 0.4-3.8         | 0.713        |
| Quadriceps strain                    | 1.8        | 0.8-3.9         | 0.215        |
| Chronic groin pain                   | 1.3        | 0.5-3.8         | 0.703        |
| <i>Age</i>                           |            |                 |              |
| >18 compared to <18                  | 1.5        | 0.2-9.7         | 1.00         |
| <b>&gt;20.4 compared to &lt;20.4</b> | <b>8.4</b> | <b>1.1-59.5</b> | <b>0.005</b> |
| <b>&gt;23.7 compared to &lt;23.7</b> | <b>4.2</b> | <b>1.6-10.4</b> | <b>0.001</b> |
| <b>&gt;28.8 compared to &lt;28.8</b> | <b>2.2</b> | <b>1.1-4.3</b>  | <b>0.043</b> |
| >32.6 compared to <32.6              | 0.7        | 0.2-2.6         | 0.739        |
| <i>Height</i>                        |            |                 |              |
| >182.3cm                             | 1.6        | 0.8-3.4         | 0.206        |
| <i>Weight (kg)</i>                   |            |                 |              |
| >77.9kg                              | 1.4        | 0.7-2.8         | 0.370        |

| <i>Univariate<br/>(Logistic<br/>regression)</i> |                                                         | OR           | 95% CI           | P<br>Value   |
|-------------------------------------------------|---------------------------------------------------------|--------------|------------------|--------------|
|                                                 | <b>Increased BFlh fascicle length<br/>(0.5cm)</b>       | <b>0.261</b> | <b>0.10-0.57</b> | <b>0.002</b> |
|                                                 | <b>Increased eccentric hamstring<br/>strength(10Nm)</b> | <b>0.910</b> | <b>0.85-0.97</b> | <b>0.004</b> |
|                                                 |                                                         |              |                  |              |

Key: cm= centimetres, BFlh= Biceps femoris long head, MVIC= Maximal voluntary isometric contraction, N =newtons, Nm=newtonmetres, N/kg= newtonmetres per kilogram, HIS+hamstring injury, ACL =anterior cruciate ligament, kg = kilograms. OR= odds ratio obtained through logistic regression, Rel. R= relative risk, CI= Confidence interval. Prognostic factors in **bold** denote statistical significance.

#### **Waldén et al<sup>42</sup>**

*Outcome: Knee injuries*

| <i>Analysis type</i>                    | <i>Prognostic factors</i>  | <i>Rel.R</i> | <i>95% CI</i>  | <i>P<br/>Value</i> |
|-----------------------------------------|----------------------------|--------------|----------------|--------------------|
| <i>Multivariate</i>                     | <i>Previous history:</i>   |              |                |                    |
| <i>(player as unit of<br/>analysis)</i> | <b>Previous ACL injury</b> | <b>3.4</b>   | <b>1.8-6.3</b> | <b>&lt;0.05</b>    |
| <i>(knee as unit of<br/>analysis)</i>   | <b>Previous ACL injury</b> | <b>4.5</b>   | <b>2.3-8.8</b> | <b>&lt;0.05</b>    |

Key: ACL=anterior cruciate ligament, Rel.R= relative risk, CI= Confidence interval. Prognostic factors in **bold** denote statistical significance.

*Outcome: Traumatic knee injuries*

| <i>Analysis type</i>                    | <i>Prognostic factors</i>  | <i>Rel.R</i> | <i>95% CI</i>  | <i>P<br/>Value</i> |
|-----------------------------------------|----------------------------|--------------|----------------|--------------------|
| <i>Multivariate</i>                     | <i>Previous history:</i>   |              |                |                    |
| <i>(player as unit of<br/>analysis)</i> | <b>Previous ACL injury</b> | <b>2.7</b>   | <b>1.3-5.8</b> | <b>&lt;0.05</b>    |
| <i>(knee as unit of<br/>analysis)</i>   | <b>Previous ACL injury</b> | <b>2.6</b>   | <b>1.1-6.7</b> | <b>&lt;0.05</b>    |

Outcome: Overuse knee injuries

| Analysis type                                                              | Prognostic factors         | Rel.R      | 95% CI          | P Value         |
|----------------------------------------------------------------------------|----------------------------|------------|-----------------|-----------------|
| Multivariate<br>(player as unit of analysis)<br>(knee as unit of analysis) | <i>Previous history:</i>   |            |                 |                 |
|                                                                            | <b>Previous ACL injury</b> | <b>4.8</b> | <b>2.0-11.2</b> | <b>&lt;0.05</b> |
|                                                                            | <b>Previous ACL injury</b> | <b>7.9</b> | <b>3.4-18.5</b> | <b>&lt;0.05</b> |

Van Dyk et al<sup>43</sup>

Outcome: Hamstring muscle strain injuries

| Analysis type | Prognostic factors                          | OR          | 95% CI           | P Value      |
|---------------|---------------------------------------------|-------------|------------------|--------------|
| Multivariate  | <i>Quadriceps isokinetic factors:</i>       |             |                  |              |
|               | Conc 60 deg/s                               | 1.01        | 1-1.01           | 0.060        |
|               | <b>BW adjusted</b>                          | <b>1.41</b> | <b>1.03-1.92</b> | <b>0.030</b> |
|               | Conc 300 deg/s                              | 1.01        | 1.00-1.01        | 0.970        |
|               | BW adjusted                                 | 0.91        | 0.53-1.79        | 0.870        |
|               | <i>Hamstring isokinetic factors:</i>        |             |                  |              |
|               | Conc 60 deg/s                               | 1.01        | 1.00-1.01        | 0.170        |
|               | BW adjusted                                 | 1.33        | 0.78-2.33        | 0.290        |
|               | Conc at 300 deg/s                           | 1.01        | 1.00-1.01        | 0.200        |
|               | BW adjusted                                 | 1.33        | 0.78-2.33        | 0.290        |
|               | Eccentric at 60 deg/s                       | 1.01        | 1.00-1.01        | 0.120        |
|               | <b>BW adjusted</b>                          | <b>1.37</b> | <b>1.01-1.85</b> | <b>0.040</b> |
|               | <i>Mixed quadriceps to hamstring ratios</i> |             |                  |              |
|               | Quads conc/hams conc 60deg/s                | 1.32        | 0.76-2.27        | 0.320        |
|               | Quads conc/hams ecc 60deg/s                 | 0.93        | 0.29-2.94        | 0.900        |
|               | Quads conc/hams conc 300deg/s               | 0.68        | 0.36-1.32        | 0.260        |
|               | Quads conc/hams ecc 60deg/s                 | 0.68        | 0.31-1.52        | 0.350        |

Key: Conc=concentric, ecc=eccentric, deg/s= degrees per second, BW= Body weight, OR= odds ratio, CI= Confidence interval. Prognostic factors in **bold** denote statistical significance.
