# Supplementary material for: Prognostic factors for specific lower extremity and spinal musculoskeletal injuries identified through medical screening and training load monitoring in professional football (soccer): a systematic review
Source: PubMed Central journal article supplement — BMJ Open Sport Exerc Med. 2017 Sep 21;3(1):e000263. doi: 10.1136/bmjsem-2017-000263 (PMC5623323; doi:10.1136/bmjsem-2017-000263), 2017-09-21
Supplement: bmjsem-2017-000263supp005.pdf [file bmjsem-2017-000263supp005.pdf]

Prognostic factors for lower extremity and spinal injuries identified through medical screening and training load monitoring in professional football (soccer): a systematic review

**Supplementary file 5: Excluded Studies**

| <b><i>Author/Excluded Study Reference</i></b> | <b><i>Reason(s) for exclusion</i></b>                                                                                                                                                                              |
|-----------------------------------------------|--------------------------------------------------------------------------------------------------------------------------------------------------------------------------------------------------------------------|
| <b>Alentorn-Geli et al[1]</b>                 | Study was of case control design                                                                                                                                                                                   |
| <b>Andersen et al[2]</b>                      | Study did not investigate prognostic factors for injury related to medical screening or training load monitoring                                                                                                   |
| <b>Aoki et al[3]</b>                          | Study reported incidence rates only and does not investigate prognostic factors related to medical screening or training load monitoring                                                                           |
| <b>Artells et al[4]</b>                       | No measures of association reported in study                                                                                                                                                                       |
| <b>Askling et al[5]</b>                       | Study was of controlled clinical trial design                                                                                                                                                                      |
| <b>Azevedo et al[6]</b>                       | Study was of case control design                                                                                                                                                                                   |
| <b>Azubuike et al[7]</b>                      | Study was of cross sectional design                                                                                                                                                                                |
| <b>Bacon et al [8]</b>                        | Outcome measures included in analysis limited to general injury categories; no specific diagnosis or location for lower extremity of spinal injuries                                                               |
| <b>Bastos et al[9]</b>                        | Used participants under 16 years of age                                                                                                                                                                            |
| <b>Bedi et al [10]</b>                        | Study utilised American Football players                                                                                                                                                                           |
| <b>Bengtsson et al [11]</b>                   | Outcome measures included in analysis limited to general injury categories; no specific diagnosis or location for lower extremity of spinal injuries used as outcomes                                              |
| <b>Bjordal et al[12]</b>                      | Study reported incidence rates only and did not investigate prognostic factors related to medical screening or training load monitoring                                                                            |
| <b>Bjorneboe et al[13]</b>                    | Outcome measures included in analysis limited to general injury categories; no specific diagnosis or anatomical location for lower extremity of spinal injuries used as outcomes                                   |
| <b>Blanch and Gabbett[14]</b>                 | Review article                                                                                                                                                                                                     |
| <b>Bowen et al[15]</b>                        | Outcome measures included in analysis limited to general injury categories; no specific diagnosis or anatomical location for lower extremity of spinal injuries used as outcomes                                   |
| <b>Bradley and Portas[16]</b>                 | No measures of association reported in study                                                                                                                                                                       |
| <b>Brink et al[17]</b>                        | Used participants under 16 years of age                                                                                                                                                                            |
| <b>Brooks et al[18]</b>                       | Outcome measures included in analysis limited to general injury categories (general lower extremity injury); no specific diagnosis or anatomical location for lower extremity of spinal injuries used as outcomes  |
| <b>Carey et al[19]</b>                        | Study utilised Australian Rules Football players                                                                                                                                                                   |
| <b>Carling et al[20]</b>                      | Outcome measures included in analysis limited to general injury categories (general lower extremity injury); no specific diagnosis or anatomical location for lower extremity of spinal injuries used as outcomes. |

|                               |                                                                                                                                                                                                                                                                    |
|-------------------------------|--------------------------------------------------------------------------------------------------------------------------------------------------------------------------------------------------------------------------------------------------------------------|
|                               | No measures of association reported in study                                                                                                                                                                                                                       |
| <b>Carling et al[21]</b>      | Outcome measures included in analysis limited to general injury categories (general lower extremity injury); no specific diagnosis or anatomical location for lower extremity of spinal injuries used as outcomes.<br>No measures of association reported in study |
| <b>Carling et al [22]</b>     | Study reported incidence rates only and did not investigate prognostic factors related to medical screening or training load monitoring                                                                                                                            |
| <b>Carling et al[23]</b>      | Outcome measures included in analysis limited to general injury categories (general lower extremity injury); no specific diagnosis or anatomical location for lower extremity of spinal injuries used as outcomes.                                                 |
| <b>Carling et al[24]</b>      | No measures of association reported in study                                                                                                                                                                                                                       |
| <b>Celebrini et al[25]</b>    | Study was of randomised controlled trial design                                                                                                                                                                                                                    |
| <b>Chalmers et al[26]</b>     | Study utilised Australian Rules Football players                                                                                                                                                                                                                   |
| <b>Chiaia et al[27]</b>       | Study did not investigate prognostic factors for injury related to medical screening or training load monitoring                                                                                                                                                   |
| <b>Chomiak et al[28]</b>      | Study utilised players under 16 and over 40 years old                                                                                                                                                                                                              |
| <b>Chorba et al[29]</b>       | Cohort was obtained from mixed sports                                                                                                                                                                                                                              |
| <b>Chougale et al[30]</b>     | Study was of audit design                                                                                                                                                                                                                                          |
| <b>Clausen et al[31]</b>      | Used participants under 16 years of age                                                                                                                                                                                                                            |
| <b>Cloke et al[32]</b>        | Used participants under 16 years of age                                                                                                                                                                                                                            |
| <b>Cloke et al[33]</b>        | Used participants under 16 years of age                                                                                                                                                                                                                            |
| <b>Cohen et al[34]</b>        | Study investigated use of MRI in predicting return to play time following hamstring injury; did not investigate MRI as prognostic factor for hamstring injury incidence                                                                                            |
| <b>Colby et al[35]</b>        | Study utilised Australian Rules Football players                                                                                                                                                                                                                   |
| <b>Colby et al[36]</b>        | Study utilised Australian Rules Football players                                                                                                                                                                                                                   |
| <b>Corrazza et al[37]</b>     | Study investigated use of imaging in predicting return to play time following thigh muscle injury; did not investigate imaging as prognostic factor for thigh muscle injury incidence                                                                              |
| <b>Crema et al[38]</b>        | Study did not investigate prognostic factors for injury related to medical screening or training load monitoring                                                                                                                                                   |
| <b>Croisier et al[39]</b>     | Study was of intervention design                                                                                                                                                                                                                                   |
| <b>Dallinga et al[40]</b>     | Study was of systematic review design                                                                                                                                                                                                                              |
| <b>Dauty et al[41]</b>        | Study was of case control design                                                                                                                                                                                                                                   |
| <b>De Ridder et al[42]</b>    | Used participants under 16 years of age. Study is of case control design                                                                                                                                                                                           |
| <b>De Ste Croix et al[43]</b> | Included participants under 16 years of age                                                                                                                                                                                                                        |
| <b>Deehan et al[44]</b>       | Used participants under 16 years of age                                                                                                                                                                                                                            |
| <b>Dellal et al[45]</b>       | Outcome measures included in analysis limited to general injury categories; no specific diagnosis or anatomical location for lower extremity of spinal injuries used as outcomes                                                                                   |
| <b>Dompier et al[46]</b>      | Used participants under 16 years of age                                                                                                                                                                                                                            |
| <b>Drew et al[47]</b>         | Article was a letter to the journal                                                                                                                                                                                                                                |
| <b>Drew et al[48]</b>         | Study was of systematic review design                                                                                                                                                                                                                              |

|                           |                                                                                                                                                                                                                                |
|---------------------------|--------------------------------------------------------------------------------------------------------------------------------------------------------------------------------------------------------------------------------|
| <b>Duhig et al[49]</b>    | Study utilised Australian Rules Football players                                                                                                                                                                               |
| <b>Dupont et al[50]</b>   | Outcome measures included in analysis limited to general injury categories; no specific diagnosis or anatomical location for lower extremity of spinal injuries used as outcomes. No measures of association reported in study |
| <b>Dvorak et al[51]</b>   | Review article                                                                                                                                                                                                                 |
| <b>Dvorak et al[52]</b>   | Outcome measures included in analysis limited to general injury categories; no specific diagnosis or anatomical location for lower extremity of spinal injuries used as outcomes. No measures of association reported in study |
| <b>Dvorak et al[53]</b>   | Study reported incidence rates only and does not investigate prognostic factors related to medical screening or training load monitoring                                                                                       |
| <b>Ehrmann et al[54]</b>  | Outcome measures included in analysis limited to general injury categories; no specific diagnosis or anatomical location for lower extremity of spinal injuries used as outcomes                                               |
| <b>Eirale et al[55]</b>   | Study reported incidence rates only and did not investigate prognostic factors related to medical screening or training load monitoring                                                                                        |
| <b>Eirale et al[56]</b>   | Study reported incidence rates only and did not investigate prognostic factors related to medical screening or training load monitoring                                                                                        |
| <b>Eirale et al[57]</b>   | Study reported incidence rates only and did not investigate prognostic factors related to medical screening or training load monitoring. Paper also retracted from journal.                                                    |
| <b>Ekstrand [58]</b>      | Editorial article                                                                                                                                                                                                              |
| <b>Ekstrand et al[59]</b> | Study did not investigate prognostic factors for injury related to medical screening or training load monitoring                                                                                                               |
| <b>Ekstrand et al[60]</b> | Study did not investigate prognostic factors for injury related to medical screening or training load monitoring                                                                                                               |
| <b>Ekstrand et al[61]</b> | Study reported incidence rates only and did not investigate prognostic factors related to medical screening or training load monitoring                                                                                        |
| <b>Ekstrand et al[62]</b> | Outcome measures included in analysis limited to general injury categories; no specific diagnosis or anatomical location for lower extremity of spinal injuries used as outcomes. No measures of association reported in study |
| <b>Ekstrand et al[63]</b> | Outcome measures included in analysis limited to upper extremity injury categories; no specific diagnosis or anatomical location for lower extremity or spinal injuries used as outcomes.                                      |
| <b>Ekstrand et al[64]</b> | Study reported incidence rates only and did not investigate prognostic factors related to medical screening or training load monitoring                                                                                        |
| <b>Ekstrand et al[65]</b> | Study reported incidence rates only and did not investigate prognostic factors related to medical screening or training load monitoring                                                                                        |

|                               |                                                                                                                                                                                                                                                                                                                            |
|-------------------------------|----------------------------------------------------------------------------------------------------------------------------------------------------------------------------------------------------------------------------------------------------------------------------------------------------------------------------|
| <b>Ekstrand et al[66]</b>     | Study investigated use of MRI in predicting return to play time following hamstring injury; did not investigate MRI as prognostic factor for hamstring injury incidence                                                                                                                                                    |
| <b>Ekstrand et al[67]</b>     | Study reported incidence rates only and did not investigate prognostic factors related to medical screening or training load monitoring                                                                                                                                                                                    |
| <b>Ekstrand et al[68]</b>     | Study reported incidence rates only and did not investigate prognostic factors related to medical screening or training load monitoring                                                                                                                                                                                    |
| <b>Ekstrand et al[69]</b>     | Study reported incidence rates only and did not investigate prognostic factors related to medical screening or training load monitoring                                                                                                                                                                                    |
| <b>Ekstrand et al[70]</b>     | Outcome measures included in analysis limited to general injury categories; no specific diagnosis or anatomical location for lower extremity of spinal injuries used as outcomes                                                                                                                                           |
| <b>Ekstrand et al[71]</b>     | Study reported incidence rates only and did not investigate prognostic factors related to medical screening or training load monitoring                                                                                                                                                                                    |
| <b>Ekstrand et al[72]</b>     | Study did not investigate prognostic factors for injury related to medical screening or training load monitoring                                                                                                                                                                                                           |
| <b>Elliot et al [73]</b>      | Study utilised American Football players                                                                                                                                                                                                                                                                                   |
| <b>Emery et al [74]</b>       | Used participants under 16 years of age                                                                                                                                                                                                                                                                                    |
| <b>Engebretsen et al [75]</b> | Study utilised amateur Football players                                                                                                                                                                                                                                                                                    |
| <b>Engebretsen et al[76]</b>  | Study utilised amateur Football players                                                                                                                                                                                                                                                                                    |
| <b>Engebretsen et al[77]</b>  | Study utilised amateur Football players                                                                                                                                                                                                                                                                                    |
| <b>Engebretsen et al[78]</b>  | Study utilised amateur Football players                                                                                                                                                                                                                                                                                    |
| <b>Engstrom et al[79]</b>     | Study reported incidence rates only and did not investigate prognostic factors related to medical screening or training load monitoring                                                                                                                                                                                    |
| <b>Ergun et al[80]</b>        | Study reported incidence rates only and did not investigate prognostic factors related to medical screening or training load monitoring. Outcome measures included in analysis limited to general injury categories; no specific diagnosis or anatomical location for lower extremity of spinal injuries used as outcomes. |
| <b>Falese et al[81]</b>       | Study reported incidence rates only and did not investigate prognostic factors related to medical screening or training load monitoring. Study did not obtain data directly at source; i.e through cohort study, rather obtained data through free public database.                                                        |
| <b>Faude et al[82]</b>        | Study reported incidence rates only and did not investigate prognostic factors related to medical screening or training load monitoring                                                                                                                                                                                    |
| <b>Fortington et al [83]</b>  | Study utilised Australian Rules Football players                                                                                                                                                                                                                                                                           |
| <b>Fousekis et al[84]</b>     | Study investigated isokinetic symmetry only and did not investigate prognostic factors related to medical screening or training load monitoring.                                                                                                                                                                           |

|                               |                                                                                                                                                                                                                                        |
|-------------------------------|----------------------------------------------------------------------------------------------------------------------------------------------------------------------------------------------------------------------------------------|
| <b>Fowler et al [85]</b>      | Outcome measures included in analysis limited to general injury categories; no specific diagnosis or anatomical location for lower extremity of spinal injuries used as outcomes.                                                      |
| <b>Franettovich et al[86]</b> | Study utilised Australian Rules Football players                                                                                                                                                                                       |
| <b>Freckleton et al [87]</b>  | Study utilised Australian Rules Football players                                                                                                                                                                                       |
| <b>Fredberg et al [88]</b>    | Study was of randomised controlled trial design                                                                                                                                                                                        |
| <b>Fuller et al[89]</b>       | Article was consensus statement and not directly relevant to aims of review                                                                                                                                                            |
| <b>Fuller et al[90]</b>       | Article was consensus statement and not directly relevant to aims of review                                                                                                                                                            |
| <b>Fuller et al[91]</b>       | Article was consensus statement and not directly relevant to aims of review                                                                                                                                                            |
| <b>Fuller et al[92]</b>       | Study did not investigate prognostic factors for injury related to medical screening or training load monitoring                                                                                                                       |
| <b>Gabbe et al[93]</b>        | Study did not investigate prognostic factors for injury related to medical screening or training load monitoring                                                                                                                       |
| <b>Gabbe et al[94]</b>        | Study did not investigate prognostic factors for injury related to medical screening or training load monitoring                                                                                                                       |
| <b>Gabbett[95]</b>            | Study utilised professional rugby players                                                                                                                                                                                              |
| <b>Gabbett et al[96]</b>      | Editorial article                                                                                                                                                                                                                      |
| <b>Gabbett et al [97]</b>     | Study utilised professional rugby players                                                                                                                                                                                              |
| <b>Gabbett et al[98]</b>      | Study was of systematic review design                                                                                                                                                                                                  |
| <b>Gastin et al[99]</b>       | Study utilised Australian Rules Football players                                                                                                                                                                                       |
| <b>Gerhardt et al[100]</b>    | No measures of association reported in study                                                                                                                                                                                           |
| <b>Gibbon [101]</b>           | Letter to journal                                                                                                                                                                                                                      |
| <b>Gouttebauge et al[102]</b> | Study reported incidence rates only and did not investigate prognostic factors related to medical screening or training load monitoring.                                                                                               |
| <b>Gribble et al[103]</b>     | Study was of case-control design                                                                                                                                                                                                       |
| <b>Hagglund et al[104]</b>    | Used participants under 16 years of age                                                                                                                                                                                                |
| <b>Hagglund et al[105]</b>    | Article was a methodology paper                                                                                                                                                                                                        |
| <b>Hagglund et al[106]</b>    | Outcome measures included in analysis limited to general injury categories; no specific diagnosis or anatomical location for lower extremity of spinal injuries used as outcomes.                                                      |
| <b>Hagglund et al[107]</b>    | Outcome measures included in analysis limited to general injury categories; no specific diagnosis or anatomical location for lower extremity of spinal injuries used as outcomes.                                                      |
| <b>Hagglund et al[108]</b>    | Outcome measures included in analysis limited to general injury categories; no specific diagnosis or anatomical location for lower extremity of spinal injuries used as outcomes.                                                      |
| <b>Hagglund et al[109]</b>    | Study reported incidence rates only and did not investigate prognostic factors related to medical screening or training load monitoring. No measures of association reported.                                                          |
| <b>Hagglund et al[110]</b>    | Study did not investigate prognostic factors for injury related to medical screening or training load monitoring. No measures of association reported. Study cohort was of mixed footballing skill levels and included amateur players |

|                            |                                                                                                                                                                                   |
|----------------------------|-----------------------------------------------------------------------------------------------------------------------------------------------------------------------------------|
| <b>Hagglund et al[111]</b> | Study did not investigate prognostic factors for injury related to medical screening or training load monitoring                                                                  |
| <b>Halabchi et al[112]</b> | Study was of cross sectional design                                                                                                                                               |
| <b>Hallen et al[113]</b>   | Study did not investigate prognostic factors for injury related to medical screening or training load monitoring                                                                  |
| <b>Hammond et al[114]</b>  | Outcome measures included in analysis limited to general injury categories; no specific diagnosis or anatomical location for lower extremity of spinal injuries used as outcomes. |
| <b>Hawkins et al[115]</b>  | Study reported incidence rates only and did not investigate prognostic factors related to medical screening or training load monitoring. No measures of association reported.     |
| <b>Hawkins et al[116]</b>  | Study reported incidence rates only and did not investigate prognostic factors related to medical screening or training load monitoring. No measures of association reported.     |
| <b>Hawkins et al[117]</b>  | Study reported incidence rates only and did not investigate prognostic factors related to medical screening or training load monitoring. No measures of association reported.     |
| <b>Hawkins et al[118]</b>  | Study reported incidence rates only and did not investigate prognostic factors related to medical screening or training load monitoring. No measures of association reported.     |
| <b>Haxhiu et al [119]</b>  | Outcome measures included in analysis limited to general injury categories; no specific diagnosis or anatomical location for lower extremity of spinal injuries used as outcomes. |
| <b>Henry et al[120]</b>    | Study utilised amateur soccer players                                                                                                                                             |
| <b>Herman et al[121]</b>   | Study utilised cohort from mixed non professional/non elite sport                                                                                                                 |
| <b>Hides et al[122]</b>    | Study utilised Australian Rules Football players                                                                                                                                  |
| <b>Hides et al[123]</b>    | Study utilised Australian Rules Football players                                                                                                                                  |
| <b>Hides et al[124]</b>    | Study utilised Australian Rules Football players                                                                                                                                  |
| <b>Howard et al[125]</b>   | Study utilised American Football players                                                                                                                                          |
| <b>Hrysomallis[126]</b>    | Review article                                                                                                                                                                    |
| <b>Hulin et al[127]</b>    | Study utilised Professional Rugby League players                                                                                                                                  |
| <b>Inklaar et al[128]</b>  | Study utilised amateur soccer players                                                                                                                                             |
| <b>Ivarsson et al[129]</b> | Outcome measures included in analysis limited to general injury categories; no specific diagnosis or anatomical location for lower extremity of spinal injuries used as outcomes. |
| <b>Ivarsson et al[130]</b> | Outcome measures included in analysis limited to general injury categories; no specific diagnosis or anatomical location for lower extremity of spinal injuries used as outcomes. |
| <b>Ivarsson et al[131]</b> | Outcome measures included in analysis limited to general injury categories; no specific diagnosis or anatomical location for lower extremity of spinal injuries used as outcomes. |
| <b>Jacobson et al[132]</b> | Study reported incidence rates only and did not investigate prognostic factors related to medical screening or training load monitoring. No measures of association reported.     |
| <b>Jain et al[133]</b>     | Study reported incidence rates only and did not investigate prognostic factors related to medical screening or training load monitoring. No measures of association reported.     |
| <b>Jaspers et al[134]</b>  | Study was of systematic review design                                                                                                                                             |

|                              |                                                                                                                                                                                                                                                                                        |
|------------------------------|----------------------------------------------------------------------------------------------------------------------------------------------------------------------------------------------------------------------------------------------------------------------------------------|
| <b>Johnson et al[135]</b>    | Outcome measures included in analysis limited to general injury categories; no specific diagnosis or anatomical location for lower extremity of spinal injuries used as outcomes.                                                                                                      |
| <b>Junge et al[136]</b>      | Study reported incidence rates only and did not investigate prognostic factors related to medical screening or training load monitoring. No measures of association reported.                                                                                                          |
| <b>Junge et al[137]</b>      | Study did not investigate prognostic factors for injury related to medical screening or training load monitoring                                                                                                                                                                       |
| <b>Junge et al[138]</b>      | Study reported incidence rates only and did not investigate prognostic factors related to medical screening or training load monitoring. No measures of association reported.                                                                                                          |
| <b>Junge et al[139]</b>      | Study did not investigate prognostic factors for injury related to medical screening or training load monitoring                                                                                                                                                                       |
| <b>Kemper et al[140]</b>     | Used participants under 16 years of age                                                                                                                                                                                                                                                |
| <b>Khan et al[141]</b>       | Study utilised non elite/non professional football players                                                                                                                                                                                                                             |
| <b>Konopinski et al[142]</b> | Outcome measures included in analysis limited to general injury categories; no specific diagnosis or anatomical location for lower extremity of spinal injuries used as outcomes.                                                                                                      |
| <b>Konopinski et al[143]</b> | Outcome measures included in analysis limited to general injury categories; no specific diagnosis or anatomical location for lower extremity of spinal injuries used as outcomes.                                                                                                      |
| <b>Kristenson et al[144]</b> | Study did not investigate prognostic factors for injury related to medical screening or training load monitoring                                                                                                                                                                       |
| <b>Kristenson et al[145]</b> | Outcome measures included in analysis limited to general injury categories; no specific diagnosis or anatomical location for lower extremity of spinal injuries used as outcomes.                                                                                                      |
| <b>Kristenson et al[146]</b> | Outcome measures included in analysis limited to general injury categories; no specific diagnosis or anatomical location for lower extremity of spinal injuries used as outcomes.                                                                                                      |
| <b>Krosshaug et al[147]</b>  | Study utilised cohort from mixed sports                                                                                                                                                                                                                                                |
| <b>Kucera et al[148]</b>     | Used participants under 16 years of age                                                                                                                                                                                                                                                |
| <b>Larsson et al[149]</b>    | Outcome measures included in analysis limited to general injury categories; no specific diagnosis or anatomical location for lower extremity of spinal injuries used as outcomes.                                                                                                      |
| <b>Le Gall et al[150]</b>    | Used participants under 16 years of age                                                                                                                                                                                                                                                |
| <b>Le Gall et al[151]</b>    | Used participants under 16 years of age                                                                                                                                                                                                                                                |
| <b>Lehance et al[152]</b>    | Used participants under 16 years of age                                                                                                                                                                                                                                                |
| <b>Leung et al[153]</b>      | Study utilised Australian Rules Football players                                                                                                                                                                                                                                       |
| <b>Leventer et al[154]</b>   | Study obtained data through open access public database rather than recording injury data at source. Outcome measures included in analysis limited to general injury categories; no specific diagnosis or anatomical location for lower extremity of spinal injuries used as outcomes. |
| <b>Lundblad et al[155]</b>   | Study did not investigate prognostic factors for injury related to medical screening or training load monitoring                                                                                                                                                                       |

|                                     |                                                                                                                                                                                   |
|-------------------------------------|-----------------------------------------------------------------------------------------------------------------------------------------------------------------------------------|
| <b>Luthje et al[156]</b>            | Study reported incidence rates only and did not investigate prognostic factors related to medical screening or training load monitoring. No measures of association reported.     |
| <b>Maffey and Emery [157]</b>       | Study was of systematic review design                                                                                                                                             |
| <b>Malina et al[158]</b>            | Used participants under 16 years of age                                                                                                                                           |
| <b>Mallo et al[159]</b>             | Outcome measures included in analysis limited to general injury categories; no specific diagnosis or anatomical location for lower extremity of spinal injuries used as outcomes. |
| <b>Malone et al[160]</b>            | Outcome measures included in analysis limited to general injury categories; no specific diagnosis or anatomical location for lower extremity of spinal injuries used as outcomes. |
| <b>McCall et al[161]</b>            | Study was of systematic review design                                                                                                                                             |
| <b>McCall et al[162]</b>            | Study was of a survey design                                                                                                                                                      |
| <b>McCann et al [163]</b>           | Conference abstract                                                                                                                                                               |
| <b>McDowell et al[164]</b>          | Conference abstract                                                                                                                                                               |
| <b>McGregor et al[165]</b>          | Study reported incidence rates only and did not investigate prognostic factors related to medical screening or training load monitoring. No measures of association reported.     |
| <b>Mendiguchia et al[166]</b>       | Review article                                                                                                                                                                    |
| <b>Mohamed et al[167]</b>           | Study was of case-control design                                                                                                                                                  |
| <b>Moses et al[168]</b>             | Study was of case report design                                                                                                                                                   |
| <b>Muckle et al [169]</b>           | Study did not investigate prognostic factors for injury related to medical screening or training load monitoring                                                                  |
| <b>Mueller-Wolffhart et al[170]</b> | Article was consensus statement and not directly relevant to aims of review                                                                                                       |
| <b>Muftly et al[171]</b>            | Study reported incidence rates only and did not investigate prognostic factors related to medical screening or training load monitoring. No measures of association reported.     |
| <b>Murray et al [172]</b>           | Study utilised Australian Rules Football players                                                                                                                                  |
| <b>Murray et al[173]</b>            | Study utilised Australian Rules Football players                                                                                                                                  |
| <b>Myer et al [174]</b>             | Study utilised cohort from mixed sports                                                                                                                                           |
| <b>Nassis et al [175]</b>           | Editorial article                                                                                                                                                                 |
| <b>Nilsson et al[176]</b>           | Used participants under 16 years of age                                                                                                                                           |
| <b>Nordstrom et al[177]</b>         | Outcome measures included in analysis limited to general injury categories; no specific diagnosis or anatomical location for lower extremity of spinal injuries used as outcomes. |
| <b>Noya Salces et al[178]</b>       | Outcome measures included in analysis limited to general injury categories; no specific diagnosis or anatomical location for lower extremity of spinal injuries used as outcomes. |
| <b>Opar et al [179]</b>             | Review article                                                                                                                                                                    |
| <b>Orchard et al[180]</b>           | Study utilised Australian Rules Football players                                                                                                                                  |
| <b>Orchard et al[181]</b>           | Study utilised Australian Rules Football players                                                                                                                                  |
| <b>Orchard et al[182]</b>           | Study utilised Australian Rules Football players                                                                                                                                  |
| <b>Orchard et al[183]</b>           | Study utilised Australian Rules Football players                                                                                                                                  |
| <b>Orchard et al[184]</b>           | Study utilised Australian Rules Football players                                                                                                                                  |



|                                 |                                                                                                                                                                                                                                                                                                     |
|---------------------------------|-----------------------------------------------------------------------------------------------------------------------------------------------------------------------------------------------------------------------------------------------------------------------------------------------------|
| <b>Ostenberg and Roos[185]</b>  | Study utilised cohort from mixed elite/non elite football                                                                                                                                                                                                                                           |
| <b>Owen et al[186]</b>          | Study was of cross sectional design                                                                                                                                                                                                                                                                 |
| <b>Owen et al[187]</b>          | Outcome measures included in analysis limited to general injury categories; no specific diagnosis or anatomical location for lower extremity of spinal injuries used as outcomes.                                                                                                                   |
| <b>Paajanen et al[188]</b>      | Study did not investigate prognostic factors for injury related to medical screening or training load monitoring                                                                                                                                                                                    |
| <b>Padua et al[189]</b>         | Used participants under 16 years of age                                                                                                                                                                                                                                                             |
| <b>Paul et al[190]</b>          | Study did not investigate prognostic factors for injury related to medical screening or training load monitoring                                                                                                                                                                                    |
| <b>Petersen et al[191]</b>      | Study reported incidence rates only and did not investigate prognostic factors related to medical screening or training load monitoring. No measures of association reported.                                                                                                                       |
| <b>Petersen et al[192]</b>      | Study did not investigate prognostic factors for injury related to medical screening or training load monitoring                                                                                                                                                                                    |
| <b>Pfirmsmann et al[193]</b>    | Study was of systematic review design                                                                                                                                                                                                                                                               |
| <b>Price et al[194]</b>         | Used participants under 16 years of age. Study reported incidence rates only and did not investigate prognostic factors related to medical screening or training load monitoring. No measures of association reported.                                                                              |
| <b>Pruna et al[195]</b>         | Outcome measures included in analysis limited to general injury categories; no specific diagnosis or anatomical location for lower extremity of spinal injuries used as outcomes.                                                                                                                   |
| <b>Pruyn et al[196]</b>         | Study utilised Australian Rules Football players                                                                                                                                                                                                                                                    |
| <b>Raimondi et al [197]</b>     | Outcome measures included in analysis limited to general injury categories; no specific diagnosis or anatomical location for lower extremity of spinal injuries used as outcomes.                                                                                                                   |
| <b>Read et al[198]</b>          | Review article                                                                                                                                                                                                                                                                                      |
| <b>Read et al[199]</b>          | Study did not investigate prognostic factors for injury related to medical screening or training load monitoring                                                                                                                                                                                    |
| <b>Renshaw and Goodwin[200]</b> | Study reported incidence rates only and did not investigate prognostic factors related to medical screening or training load monitoring. No measures of association reported.                                                                                                                       |
| <b>Robinson et al[201]</b>      | No measures of association reported.                                                                                                                                                                                                                                                                |
| <b>Rogalski et al[202]</b>      | Study utilised Australian Rules Football players                                                                                                                                                                                                                                                    |
| <b>Romiti et al[203]</b>        | Study utilised Australian Rules Football players                                                                                                                                                                                                                                                    |
| <b>Roos et al[204]</b>          | Study utilised cohort from non elite/non professional football                                                                                                                                                                                                                                      |
| <b>Ryynanen et al[205]</b>      | Study did not investigate prognostic factors for injury related to medical screening or training load monitoring. Outcome measures included in analysis limited to general injury categories; no specific diagnosis or anatomical location for lower extremity of spinal injuries used as outcomes. |
| <b>Shojaedin et al [206]</b>    | Study of cross sectional design                                                                                                                                                                                                                                                                     |
| <b>Small et al[207]</b>         | Study utilised cohort from mixed elite/non elite football                                                                                                                                                                                                                                           |
| <b>Sman et al[208]</b>          | Study utilised Australian Rules Football and Rugby players                                                                                                                                                                                                                                          |
| <b>Snoeker et al[209]</b>       | Study of systematic review design                                                                                                                                                                                                                                                                   |

|                                 |                                                                                                                                                                                                                                                                                                                                                                 |
|---------------------------------|-----------------------------------------------------------------------------------------------------------------------------------------------------------------------------------------------------------------------------------------------------------------------------------------------------------------------------------------------------------------|
| <b>Soderman et al[210]</b>      | Study reported incidence rates only and did not investigate prognostic factors related to medical screening or training load monitoring. No measures of association reported.                                                                                                                                                                                   |
| <b>Soderman et al[211]</b>      | Outcome measures included in analysis limited to general injury categories; no specific diagnosis or anatomical location for lower extremity of spinal injuries used as outcomes.                                                                                                                                                                               |
| <b>Soligard et al[212]</b>      | Used participants under 16 years of age and were amateur players.                                                                                                                                                                                                                                                                                               |
| <b>Steffen et al [213]</b>      | Study utilised cohort from mixed elite sports                                                                                                                                                                                                                                                                                                                   |
| <b>Steffen et al[214]</b>       | Used participants under 16 years of age                                                                                                                                                                                                                                                                                                                         |
| <b>Stubbe et al [215]</b>       | Study reported incidence rates only and did not investigate prognostic factors related to medical screening or training load monitoring. No measures of association reported.                                                                                                                                                                                   |
| <b>Svensson et al[216]</b>      | No measures of association reported.                                                                                                                                                                                                                                                                                                                            |
| <b>Svensson et al[217]</b>      | No measures of association reported.                                                                                                                                                                                                                                                                                                                            |
| <b>Tegnander et al[218]</b>     | Study reported incidence rates only and did not investigate prognostic factors related to medical screening or training load monitoring. No measures of association reported.                                                                                                                                                                                   |
| <b>Thompson et al[219]</b>      | Used participants under 16 years of age                                                                                                                                                                                                                                                                                                                         |
| <b>Tourny et al[220]</b>        | Used participants under 16 years of age                                                                                                                                                                                                                                                                                                                         |
| <b>Ueblacker et al[221]</b>     | Study reported incidence rates only and did not investigate prognostic factors related to medical screening or training load monitoring. No measures of association reported.                                                                                                                                                                                   |
| <b>Ullah et al [222]</b>        | Study utilised cohort from elite Rugby                                                                                                                                                                                                                                                                                                                          |
| <b>Van der Sluis et al[223]</b> | Used participants under 16 years of age                                                                                                                                                                                                                                                                                                                         |
| <b>Van der Sluis et al[224]</b> | Used participants under 16 years of age                                                                                                                                                                                                                                                                                                                         |
| <b>Van Doormaal et al[225]</b>  | Study utilised cohort from amateur football                                                                                                                                                                                                                                                                                                                     |
| <b>Vanlommel et al[226]</b>     | Study reported incidence rates only and did not investigate prognostic factors related to medical screening or training load monitoring. No measures of association reported. Study utilised cohort from mixed elite/non elite football                                                                                                                         |
| <b>Venturelli et al[227]</b>    | Used participants under 16 years of age                                                                                                                                                                                                                                                                                                                         |
| <b>Verhagen[228]</b>            | Clinical commentary                                                                                                                                                                                                                                                                                                                                             |
| <b>Verrall et al[229]</b>       | Study utilised Australian Rules Football players                                                                                                                                                                                                                                                                                                                |
| <b>Veugelers et al[230]</b>     | Study utilised Australian Rules Football players                                                                                                                                                                                                                                                                                                                |
| <b>Walden et al[231]</b>        | Study reported incidence rates only and did not investigate prognostic factors related to medical screening or training load monitoring. No measures of association reported.                                                                                                                                                                                   |
| <b>Walden et al[232]</b>        | Study reported incidence rates only and did not investigate prognostic factors related to medical screening or training load monitoring. No measures of association reported. Outcome measures included in analysis limited to general injury categories; no specific diagnosis or anatomical location for lower extremity of spinal injuries used as outcomes. |
| <b>Walden et al[232]</b>        | No measures of association reported.                                                                                                                                                                                                                                                                                                                            |
| <b>Walden et al[233]</b>        | Study was of systematic review design                                                                                                                                                                                                                                                                                                                           |

|                             |                                                                                                                                                                                   |
|-----------------------------|-----------------------------------------------------------------------------------------------------------------------------------------------------------------------------------|
| <b>Walden et al [234]</b>   | Study reported incidence rates only and did not investigate prognostic factors related to medical screening or training load monitoring. No measures of association reported.     |
| <b>Walden et al[235]</b>    | Outcome measures included in analysis limited to general injury categories; no specific diagnosis or anatomical location for lower extremity of spinal injuries used as outcomes. |
| <b>Walden et al[236]</b>    | Review article                                                                                                                                                                    |
| <b>Warren et al[237]</b>    | Study utilised Australian Rules Football players                                                                                                                                  |
| <b>Waterman et al[238]</b>  | Study utilised American Military Cadets                                                                                                                                           |
| <b>Watsford et al[239]</b>  | Study utilised Australian Rules Football players                                                                                                                                  |
| <b>Watson et al[240]</b>    | Used participants under 16 years of age                                                                                                                                           |
| <b>Wekesa[241]</b>          | Study reported incidence rates only and did not investigate prognostic factors related to medical screening or training load monitoring. No measures of association reported.     |
| <b>Werner et al[242]</b>    | Study reported incidence rates only and did not investigate prognostic factors related to medical screening or training load monitoring. No measures of association reported.     |
| <b>Wilkerson et al[243]</b> | Study utilised American Football players                                                                                                                                          |
| <b>Witvrouw et al[244]</b>  | No measures of association reported.                                                                                                                                              |
| <b>Woods et al[245]</b>     | Study reported incidence rates only and did not investigate prognostic factors related to medical screening or training load monitoring. No measures of association reported.     |
| <b>Woods et al[246]</b>     | Study reported incidence rates only and did not investigate prognostic factors related to medical screening or training load monitoring. No measures of association reported.     |
| <b>Woods et al[247]</b>     | Study reported incidence rates only and did not investigate prognostic factors related to medical screening or training load monitoring. No measures of association reported.     |
| <b>Yeung et al[248]</b>     | No measures of association reported.                                                                                                                                              |

#### References for *excluded* studies:

1. Alentorn-Geli E, Alvarez-Diaz P, Ramon S, Marin M, Steinbacher G, Boffa JJ et al. Assessment of neuromuscular risk factors for anterior cruciate ligament injury through tensiomyography in male soccer players. *Knee Surg Sports Traumatol Arthrosc.* 2015;23(9):2508-13. doi:10.1007/s00167-014-3018-1.
2. Andersen TE, Larsen O, Tenga A, Engebretsen L, Bahr R. Football incident analysis: a new video based method to describe injury mechanisms in professional football. *Br J Sports Med.* 2003;37(3):226-32.
3. Aoki H, O'Hata N, Kohno T, Morikawa T, Seki J. A 15-year prospective epidemiological account of acute traumatic injuries during official professional soccer league matches in Japan. *Am J Sports Med.* 2012;40(5):1006-14. doi:10.1177/0363546512438695.
4. Artells R, Pruna R, Dellal A, Maffulli N. Elastin: a possible genetic biomarker for more severe ligament injuries in elite soccer. A pilot study. *Muscles, ligaments and tendons journal.* 2016;6(2):188-92. doi:10.11138/mltj/2016.6.2.188.

5. Askling C, Karlsson J, Thorstensson A. Hamstring injury occurrence in elite soccer players after preseason strength training with eccentric overload. *Scand J Med Sci Sports*. 2003;13(4):244-50.
6. Azevedo RR, da Rocha ES, Franco PS, Carpes FP. Plantar pressure asymmetry and risk of stress injuries in the foot of young soccer players. *Phys Ther Sport*. 2016. doi:10.1016/j.ptsp.2016.10.001.
7. Azubuike SO, Okojie OH. An epidemiological study of football (soccer) injuries in Benin City, Nigeria. *Br J Sports Med*. 2009;43(5):382-6. doi:10.1136/bjsm.2008.051565.
8. Bacon CS, Mauger AR. Prediction of overuse injuries in professional U18-U21 footballers using metrics of training distance and intensity. *J Strength Cond Res*. 2016. doi:10.1519/jsc.0000000000001744.
9. Bastos FN, Vanderlei FM, Vanderlei LC, Junior JN, Pastre CM. Investigation of characteristics and risk factors of sports injuries in young soccer players: a retrospective study. *Int Arch Med*. 2013;6(1):14. doi:10.1186/1755-7682-6-14.
10. Bedi A, Warren RF, Wojtys EM, Oh YK, Ashton-Miller JA, Oltean H et al. Restriction in hip internal rotation is associated with an increased risk of ACL injury. *Knee Surg Sports Traumatol Arthrosc*. 2016;24(6):2024-31. doi:10.1007/s00167-014-3299-4.
11. Bengtsson H, Ekstrand J, Walden M, Hagglund M. Match injury rates in professional soccer vary with match result, match venue, and type of competition. *Am J Sports Med*. 2013;41(7):1505-10. doi:10.1177/0363546513486769.
12. Bjordal JM, Arnly F, Hannestad B, Strand T. Epidemiology of anterior cruciate ligament injuries in soccer. *Am J Sports Med*. 1997;25(3):341-5.
13. Bjerneboe J, Bahr R, Andersen TE. Gradual increase in the risk of match injury in Norwegian male professional football: a 6-year prospective study. *Scand J Med Sci Sports*. 2014;24(1):189-96. doi:10.1111/j.1600-0838.2012.01476.x.
14. Blanch P, Gabbett TJ. Has the athlete trained enough to return to play safely? The acute:chronic workload ratio permits clinicians to quantify a player's risk of subsequent injury. *Br J Sports Med*. 2016;50(8):471-5. doi:10.1136/bjsports-2015-095445.
15. Bowen L, Gross AS, Gimpel M, Li FX. Accumulated workloads and the acute:chronic workload ratio relate to injury risk in elite youth football players. *Br J Sports Med*. 2016. doi:10.1136/bjsports-2015-095820.
16. Bradley PS, Portas MD. The relationship between preseason range of motion and muscle strain injury in elite soccer players. *J Strength Cond Res*. 2007;21(4):1155-9.
17. Brink MS. Monitoring stress and recovery: new insights for the prevention of injuries and illnesses in elite youth soccer players. *Br J Sports Med*. 2010;44(11):809-15.
18. Brooks MA, Peterson K, Biese K, Sanfilippo J, Heiderscheit BC, Bell DR. Concussion Increases Odds of Sustaining a Lower Extremity Musculoskeletal Injury After Return to Play Among Collegiate Athletes. *Am J Sports Med*. 2016;44(3):742-7. doi:10.1177/0363546515622387.
19. Carey DL, Blanch P, Ong KL, Crossley KM, Crow J, Morris ME. Training loads and injury risk in Australian football-differing acute: chronic workload ratios influence match injury risk. *Br J Sports Med*. 2016. doi:10.1136/bjsports-2016-096309.
20. Carling C, Le Gall F, Dupont G. Are Physical Performance and Injury Risk in a Professional Soccer Team in Match-Play Affected Over a Prolonged Period of Fixture Congestion? *Int J Sports Med*. 2012;33(1):36-42.
21. Carling C, Le Gall F, McCall A, Nedelec M, Dupont G. Squad management, injury and match performance in a professional soccer team over a championship-winning season. *European journal of sport science*. 2015;15(7):573-82. doi:10.1080/17461391.2014.955885.

22. Carling C, Le Gall F, Orhant E. A four-season prospective study of muscle strain reoccurrences in a professional football club. *Res Sports Med.* 2011;19(2):92-102. doi:10.1080/15438627.2011.556494.
23. Carling C, McCall A, Le Gall F, Dupont G. The impact of in-season national team soccer play on injury and player availability in a professional club. *J Sports Sci.* 2015;33(17):1751-7. doi:10.1080/02640414.2015.1013051.
24. Carling C, Orhant E, LeGall F. Match injuries in professional soccer: inter-seasonal variation and effects of competition type, match congestion and positional role. *Int J Sports Med.* 2010;31(4):271-6. doi:10.1055/s-0029-1243646.
25. Celebrini RG, Eng JJ, Miller WC, Ekegren CL, Johnston JD, Depew TA et al. Effect of a novel movement strategy in decreasing ACL risk factors in female adolescent soccer players: a randomized controlled trial. *Clin J Sport Med.* 2014;24(2):134-41. doi:10.1097/jsm.0000000000000014.
26. Chalmers S, Magarey ME, Esterman A, Speechley M, Scase E, Heynen M. The relationship between pre-season fitness testing and injury in elite junior Australian football players. *J Sci Med Sport.* 2013;16(4):307-11.
27. Chiaia TA, Maschi RA, Stuhr RM, Rogers JR, Sheridan MA, Callahan LR et al. A musculoskeletal profile of elite female soccer players. *HSS J.* 2009;5(2):186-95. doi:10.1007/s11420-009-9108-9.
28. Chomiak J, Junge A, Peterson L, Dvorak J. Severe injuries in football players. Influencing factors. *Am J Sports Med.* 2000;28(5 Suppl):S58-68.
29. Chorba RS, Chorba DJ, Bouillon LE, Overmyer CA, Landis JA. Use of a functional movement screening tool to determine injury risk in female collegiate athletes. *N Am J Sports Phys Ther.* 2010;5(2):47-54 8p.
30. Chougle A, Batty PD, Hodgkinson JP. Audit of Injuries in a Premiership Football Squad over a Five-Year Period. *J Sports Sci Med.* 2005;4(2):211-3.
31. Clausen MB, Tang L, Zebis MK, Krstrup P, Holmich P, Wedderkopp N et al. Self-reported previous knee injury and low knee function increase knee injury risk in adolescent female football. *Scand J Med Sci Sports.* 2016;26(8):919-26. doi:10.1111/sms.12521.
32. Cloke DJ, Ansell P, Avery P, Deehan D. Ankle injuries in football academies: a three-centre prospective study. *Br J Sports Med.* 2011;45(9):702-8. doi:10.1136/bjsm.2009.067900.
33. Cloke DJ, Spencer S, Hodson A, Deehan D. The epidemiology of ankle injuries occurring in English Football Association academies. *Br J Sports Med.* 2009;43(14):1119-25. doi:10.1136/bjsm.2008.052050.
34. Cohen SB, Towers JD, Zoga A, Irrgang JJ, Makda J, Deluca PF et al. Hamstring injuries in professional football players: magnetic resonance imaging correlation with return to play. *Sports health.* 2011;3(5):423-30. doi:10.1177/1941738111403107.
35. Colby M, Dawson B, Heasman J, Rogalski B, Gabbett TJ. Training and game loads and injury risk in elite Australian footballers. *J Strength Cond Res.* 2014. doi:10.1519/jsc.0000000000000362.
36. Colby MJ, Dawson B, Heasman J, Rogalski B, Gabbett TJ. Accelerometer and GPS-derived running loads and injury risk in elite Australian footballers. *Journal of strength and conditioning research / National Strength & Conditioning Association.* 2014;28(8):2244-52.
37. Corazza A, Orlandi D, Baldari A, Gatto P, Stelletti M, Mazzola C et al. Thigh muscles injuries in professional soccer players: a one year longitudinal study. *Muscles, ligaments and tendons journal.* 2013;3(4):331-6.
38. Crema MD, Guermazi A, Tol JL, Niu J, Hamilton B, Roemer FW. Acute hamstring injury in football players: Association between anatomical location and extent of injury-A large single-center MRI report. *J Sci Med Sport.* 2016;19(4):317-22. doi:10.1016/j.jsams.2015.04.005.

39. Croisier J-L, Ganteaume S, Binet J, Genty M, Ferret J-M. Strength Imbalances and Prevention of Hamstring Injury in Professional Soccer Players. *Am J Sports Med.* 2008;36(8):1469-75.
40. Dallinga JM, Benjaminse A, Lemmink KA. Which screening tools can predict injury to the lower extremities in team sports?: a systematic review. *Sports Med.* 2012;42(9):791-815. doi:10.2165/11632730-000000000-00000.
41. Dauty M, Menu P, Fouasson-Chailloux A, Ferreol S, Dubois C. Prediction of hamstring injury in professional soccer players by isokinetic measurements. *Muscles, ligaments and tendons journal.* 2016;6(1):116-23. doi:10.11138/mltj/2016.6.1.116.
42. De Ridder R, Witvrouw E, Dolphens M, Roosen P, Van Ginckel A. Hip Strength as an Intrinsic Risk Factor for Lateral Ankle Sprains in Youth Soccer Players: A 3-Season Prospective Study. *Am J Sports Med.* 2016. doi:10.1177/0363546516672650.
43. De Ste Croix MB, Priestley AM, Lloyd RS, Oliver JL. ACL injury risk in elite female youth soccer: Changes in neuromuscular control of the knee following soccer-specific fatigue. *Scand J Med Sci Sports.* 2015;25(5):e531-8. doi:10.1111/sms.12355.
44. Deehan DJ, Bell K, McCaskie AW. Adolescent musculoskeletal injuries in a football academy. *J Bone Joint Surg Br.* 2007;89(1):5-8. doi:10.1302/0301-620x.89b1.18427.
45. Dellal A, Lago-Penas C, Rey E, Chamari K, Orhant E. The effects of a congested fixture period on physical performance, technical activity and injury rate during matches in a professional soccer team. *Br J Sports Med.* 2015;49(6):390-4. doi:10.1136/bjsports-2012-091290.
46. Dompier TP, Powell JW, Barron MJ, Moore MT. Time-loss and non-time-loss injuries in youth football players. *Journal of athletic training.* 2007;42(3):395-402.
47. Drew MK, Blanch P, Purdam C, Gabbett TJ. Yes, rolling averages are a good way to assess training load for injury prevention. Is there a better way? Probably, but we have not seen the evidence. *Br J Sports Med.* 2016. doi:10.1136/bjsports-2016-096609.
48. Drew MK, Finch CF. The Relationship Between Training Load and Injury, Illness and Soreness: A Systematic and Literature Review. *Sports Med.* 2016;46(6):861-83. doi:10.1007/s40279-015-0459-8.
49. Duhig S, Shield AJ, Opar D, Gabbett TJ, Ferguson C, Williams M. Effect of high-speed running on hamstring strain injury risk. *Br J Sports Med.* 2016;50(24):1536-40. doi:10.1136/bjsports-2015-095679.
50. Dupont G, Nedelec M, McCall A, McCormack D, Berthoin S, Wisloff U. Effect of 2 soccer matches in a week on physical performance and injury rate. *The American Journal of Sports Medicine.* 2010;38(9):1752-8.
51. Dvorak J, Junge A. Football injuries and physical symptoms. A review of the literature. *Am J Sports Med.* 2000;28(5 Suppl):S3-9.
52. Dvorak J, Junge A, Chomiak J, Graf-Baumann T, Peterson L, Rosch D et al. Risk factor analysis for injuries in football players. Possibilities for a prevention program. *Am J Sports Med.* 2000;28(5 Suppl):S69-74.
53. Dvorak J, Junge A, Derman W, Schweltnus M. Injuries and illnesses of football players during the 2010 FIFA World Cup. *Br J Sports Med.* 2011;45(8):626-30. doi:10.1136/bjism.2010.079905.
54. Ehrmann FE, Duncan CS, Sindhusake D, Franzen WN, Greene DA. GPS and injury prevention in professional soccer. *Journal of Strength & Conditioning Research (Lippincott Williams & Wilkins).* 2016;30(2):360-7.
55. Eirale C, Farooq A, Smiley FA, Tol JL, Chalabi H. Epidemiology of football injuries in Asia: a prospective study in Qatar. *J Sci Med Sport.* 2013;16(2):113-7. doi:10.1016/j.jsams.2012.07.001.

56. Eirale C, Tol JL, Farooq A, Smiley F, Chalabi H. Low injury rate strongly correlates with team success in Qatari professional football. *Br J Sports Med.* 2013;47(12):807-8. doi:10.1136/bjsports-2012-091040.
57. Eirale C, Tol JL, Whiteley R, Chalabi H, Holmich P. Different injury pattern in goalkeepers compared to field players: a three-year epidemiological study of professional football. *J Sci Med Sport.* 2014;17(1):34-8. doi:10.1016/j.jsams.2013.05.004.
58. Ekstrand J. Preventing injuries in professional football: thinking bigger and working together. *Br J Sports Med.* 2016;50(12):709-10. doi:10.1136/bjsports-2016-096333.
59. Ekstrand J, Askling C, Magnusson H, Mithoefer K. Return to play after thigh muscle injury in elite football players: implementation and validation of the Munich muscle injury classification. *Br J Sports Med.* 2013;47(12):769-74. doi:10.1136/bjsports-2012-092092.
60. Ekstrand J, Gillquist J. The frequency of muscle tightness and injuries in soccer players. *Am J Sports Med.* 1982;10(2):75-8.
61. Ekstrand J, Gillquist J. Soccer injuries and their mechanisms: a prospective study. *Med Sci Sports Exerc.* 1983;15(3):267-70.
62. Ekstrand J, Hagglund M, Kristenson K, Magnusson H, Walden M. Fewer ligament injuries but no preventive effect on muscle injuries and severe injuries: an 11-year follow-up of the UEFA Champions League injury study. *Br J Sports Med.* 2013;47:732-7.
63. Ekstrand J, Hagglund M, Tornqvist H, Kristenson K, Bengtsson H, Magnusson H et al. Upper extremity injuries in male elite football players. *Knee Surg Sports Traumatol Arthrosc.* 2013;21(7):1626-32. doi:10.1007/s00167-012-2164-6.
64. Ekstrand J, Hagglund M, Walden M. Epidemiology of muscle injuries in professional football (soccer). *Am J Sports Med.* 2011;39(6):1226-32. doi:10.1177/0363546510395879.
65. Ekstrand J, Healy JC, Walden M, Lee JC, English B, Hagglund M. Hamstring muscle injuries in professional football: the correlation of MRI findings with return to play. *Br J Sports Med.* 2012;46(2):112-7. doi:10.1136/bjsports-2011-090155.
66. Ekstrand J, Lee JC, Healy JC. MRI findings and return to play in football: a prospective analysis of 255 hamstring injuries in the UEFA Elite Club Injury Study. *Br J Sports Med.* 2016;50(12):738-43. doi:10.1136/bjsports-2016-095974.
67. Ekstrand J, Roos H, Tropp H. Normal course of events amongst Swedish soccer players: an 8-year follow-up study. *Br J Sports Med.* 1990;24(2):117-9.
68. Ekstrand J, Torstveit MK. Stress fractures in elite male football players. *Scand J Med Sci Sports.* 2012;22(3):341-6. doi:10.1111/j.1600-0838.2010.01171.x.
69. Ekstrand J, Tropp H. The incidence of ankle sprains in soccer. *Foot Ankle.* 1990;11(1):41-4.
70. Ekstrand J, Walden M, Hagglund M. A congested football calendar and the wellbeing of players: correlation between match exposure of European footballers before the World Cup 2002 and their injuries and performances during that World Cup. *Br J Sports Med.* 2004;38(4):493-7. doi:10.1136/bjism.2003.009134.
71. Ekstrand J, Walden M, Hagglund M. Risk for injury when playing in a national football team. *Scand J Med Sci Sports.* 2004;14(1):34-8.
72. Ekstrand J, Walden M, Hagglund M. Hamstring injuries have increased by 4% annually in men's professional football, since 2001: a 13-year longitudinal analysis of the UEFA Elite Club injury study. *Br J Sports Med.* 2016;50(12):731-7. doi:10.1136/bjsports-2015-095359.
73. Elliott MC, Zarins B, Powell JW, Kenyon CD. Hamstring muscle strains in professional football players: a 10-year review. *Am J Sports Med.* 2011;39(4):843-50. doi:10.1177/0363546510394647.

74. Emery CA, Meeuwisse WH, Hartmann SE. Evaluation of risk factors for injury in adolescent soccer: implementation and validation of an injury surveillance system. *Am J Sports Med.* 2005;33(12):1882-91. doi:10.1177/0363546505279576.
75. Engebretsen AH, Myklebust G, Holme I, Engebretsen L, Bahr R. Intrinsic risk factors for groin injuries among male soccer players: a prospective cohort study. *The American Journal of Sports Medicine.* 2010;38(10):2051-7.
76. Engebretsen AH, Myklebust G, Holme I, Engebretsen L, Bahr R. Intrinsic risk factors for hamstring injuries among male soccer players: a prospective cohort study. *The American Journal of Sports Medicine.* 2010;38(6):1147-53.
77. Engebretsen AH, Myklebust G, Holme I, Engebretsen L, Bahr R. Intrinsic risk factors for acute ankle injuries among male soccer players: a prospective cohort study. *Scand J Med Sci Sports.* 2010;20(3):403-10. doi:10.1111/j.1600-0838.2009.00971.x.
78. Engebretsen AH, Myklebust G, Holme I, Engebretsen L, Bahr R. Intrinsic risk factors for acute knee injuries among male football players: a prospective cohort study. *Scand J Med Sci Sports.* 2011;21(5):645-52. doi:10.1111/j.1600-0838.2010.01095.x.
79. Engstrom B, Johansson C, Tornkvist H. Soccer injuries among elite female players. *Am J Sports Med.* 1991;19(4):372-5.
80. Ergun M, Denerel HN, Binnet MS, Ertat KA. Injuries in elite youth football players: a prospective three-year study. *Acta Orthop Traumatol Turc.* 2013;47(5):339-46.
81. Falese L, Della Valle P, Federico B. Epidemiology of football (soccer) injuries in the 2012/2013 and 2013/2014 seasons of the Italian Serie A. *Res Sports Med.* 2016;24(4):426-32. doi:10.1080/15438627.2016.1239105.
82. Faude O, Junge A, Kindermann W, Dvorak J. Injuries in female soccer players: a prospective study in the German national league. *Am J Sports Med.* 2005;33(11):1694-700. doi:10.1177/0363546505275011.
83. Fortington LV, Berry J, Buttifant D, Ullah S, Diamantopoulou K, Finch CF. Shorter time to first injury in first year professional football players: A cross-club comparison in the Australian Football League. *J Sci Med Sport.* 2016;19(1):18-23.
84. Fousekis K, Tsepis E, Vagenas G. Multivariate isokinetic strength asymmetries of the knee and ankle in professional soccer players. *J Sports Med Phys Fitness.* 2010;50(4):465-74.
85. Fowler P, Duffield R, Waterson A, Vaile J. Effects of regular away travel on training loads, recovery, and injury rates in professional Australian soccer players. *Int J Sports Physiol Perform.* 2015;10(5):546-52. doi:10.1123/ijsp.2014-0266.
86. Franettovich Smith MM, Bonacci J, Mendis MD, Christie C, Rotstein A, Hides JA. Gluteus medius activation during running is a risk factor for season hamstring injuries in elite footballers. *J Sci Med Sport.* 2016. doi:10.1016/j.jsams.2016.07.004.
87. Freckleton G, Cook J, Pizzari T. The predictive validity of a single leg bridge test for hamstring injuries in Australian Rules Football Players. *Br J Sports Med.* 2014;48(8):1-5.
88. Fredberg U, Bolvig L, Andersen NT. Prophylactic training in asymptomatic soccer players with ultrasonographic abnormalities in Achilles and patellar tendons: the Danish Super League Study. *Am J Sports Med.* 2008;36(3):451-60. doi:10.1177/0363546507310073.
89. Fuller CW, Ekstrand J, Junge A, Andersen TE, Bahr R, Dvorak J et al. Consensus statement on injury definitions and data collection procedures in studies of football (soccer) injuries. *Br J Sports Med.* 2006;40(3):193-201. doi:10.1136/bjsm.2005.025270.
90. Fuller CW, Ekstrand J, Junge A, Andersen TE, Bahr R, Dvorak J et al. Consensus statement on injury definitions and data collection procedures in studies of football (soccer) injuries. *Clin J Sport Med.* 2006;16(2):97-106.
91. Fuller CW, Ekstrand J, Junge A, Andersen TE, Bahr R, Dvorak J et al. Consensus statement on injury definitions and data collection procedures in studies of football (soccer) injuries. *Scand J Med Sci Sports.* 2006;16(2):83-92. doi:10.1111/j.1600-0838.2006.00528.x.



92. Fuller CW, Smith GL, Junge A, Dvorak J. The influence of tackle parameters on the propensity for injury in international football. *Am J Sports Med.* 2004;32(1 Suppl):43s-53s.
93. Gabbe BJ, Bailey M, Cook JL, Makdissi M, Scase E, Ames N et al. The association between hip and groin injuries in the elite junior football years and injuries sustained during elite senior competition. *Br J Sports Med.* 2010;44(11):799-802. doi:10.1136/bjsm.2009.062554.
94. Gabbe BJ, Finch CF, Wajswelner H, Bennell KL. Predictors of Lower Extremity Injuries at the Community Level of Australian Football. *Clin J Sport Med.* 2004;14(2):56-63.
95. Gabbett TJ. THE DEVELOPMENT AND APPLICATION OF AN INJURY PREDICTION MODEL FOR NONCONTACT, SOFT-TISSUE INJURIES IN ELITE COLLISION SPORT ATHLETES. *J Strength Cond Res.* 2010;24(10):2593-603.
96. Gabbett TJ, Hulin BT, Blanch P, Whiteley R. High training workloads alone do not cause sports injuries: how you get there is the real issue. *Br J Sports Med.* 2016;50(8):444-5. doi:10.1136/bjsports-2015-095567.
97. Gabbett TJ, Ullah S. Relationship between running loads and soft-tissue injury in elite team sport athletes. *J Strength Cond Res.* 2012;26(4):953-60.
98. Gabbett TJ, Whyte DG, Hartwig TB, Wescombe H, Naughton GA. The relationship between workloads, physical performance, injury and illness in adolescent male football players. *Sports Med.* 2014;44(7):989-1003. doi:10.1007/s40279-014-0179-5.
99. Gastin PB, Meyer D, Huntsman E, Cook J. Increase in Injury Risk With Low Body Mass and Aerobic-Running Fitness in Elite Australian Football. *Int J Sports Physiol Perform.* 2015;10(4):458-63 6p. doi:10.1123/ijsp.2014-0257.
100. Gerhardt MB, Romero AA, Silvers HJ, Harris DJ, Watanabe D, Mandelbaum BR. The prevalence of radiographic hip abnormalities in elite soccer players. *Am J Sports Med.* 2012;40(3):584-8. doi:10.1177/0363546511432711.
101. Gibbon WW. Groin pain in professional soccer players: a comparison of England and the rest of Western Europe. *Br J Sports Med.* 1999;33(6):435.
102. Gouttebauge V, Hughes Schwab BA, Vivian A, G MMJK. Injuries, Matches Missed and the Influence of Minimum Medical Standards in the A-League Professional Football: A 5-Year Prospective Study. *Asian J Sports Med.* 2016;7(1):e31385. doi:10.5812/asj.31385.
103. Gribble PA, Terada M, Beard MQ, Kosik KB, Lepley AS, McCann RS et al. Prediction of Lateral Ankle Sprains in Football Players Based on Clinical Tests and Body Mass Index. *Am J Sports Med.* 2016;44(2):460-7. doi:10.1177/0363546515614585.
104. Hagglund M, Walden M. Risk factors for acute knee injury in female youth football. *Knee Surg Sports Traumatol Arthrosc.* 2016;24(3):737-46. doi:10.1007/s00167-015-3922-z.
105. Hagglund M, Walden M, Bahr R, Ekstrand J. Methods for epidemiological study of injuries to professional football players: developing the UEFA model. *Br J Sports Med.* 2005;39(6):340-6. doi:10.1136/bjsm.2005.018267.
106. Hagglund M, Walden M, Ekstrand J. Exposure and injury risk in Swedish elite football: a comparison between seasons 1982 and 2001. *Scand J Med Sci Sports.* 2003;13(6):364-70.
107. Hagglund M, Walden M, Ekstrand J. Injury incidence and distribution in elite football--a prospective study of the Danish and the Swedish top divisions. *Scand J Med Sci Sports.* 2005;15(1):21-8. doi:10.1111/j.1600-0838.2004.00395.x.
108. Hagglund M, Walden M, Ekstrand J. UEFA injury study--an injury audit of European Championships 2006 to 2008. *Br J Sports Med.* 2009;43(7):483-9. doi:10.1136/bjsm.2008.056937.
109. Hagglund M, Walden M, Ekstrand J. Injuries among male and female elite football players. *Scand J Med Sci Sports.* 2009;19(6):819-27. doi:10.1111/j.1600-0838.2008.00861.x.
110. Hagglund M, Walden M, Ekstrand J. Injury recurrence is lower at the highest professional football level than at national and amateur levels: does sports medicine and

- sports physiotherapy deliver? *Br J Sports Med.* 2016;50(12):751-8. doi:10.1136/bjsports-2015-095951.
111. Hagglund M, Walden M, Magnusson H, Kristenson K, Bengtsson H, Ekstrand J. Injuries affect team performance negatively in professional football: an 11-year follow-up of the UEFA Champions League injury study. *Br J Sports Med.* 2013;47(12):738-42. doi:10.1136/bjsports-2013-092215.
112. Halabchi F, Angoorani H, Mirshahi M, Pourgharib Shahi MH, Mansournia MA. The Prevalence of Selected Intrinsic Risk Factors for Ankle Sprain Among Elite Football and Basketball Players. *Asian J Sports Med.* 2016;7(3):e35287. doi:10.5812/asjasm.35287.
113. Hallen A, Ekstrand J. Return to play following muscle injuries in professional footballers. *J Sports Sci.* 2014;32(13):1229-36. doi:10.1080/02640414.2014.905695.
114. Hammond LE, Lilley JM, Pope GD, Ribbans WJ. The impact of playing in matches while injured on injury surveillance findings in professional football. *Scand J Med Sci Sports.* 2014;24(3):e195-200. doi:10.1111/sms.12134.
115. Hawkins RD, Fuller CW. Risk assessment in professional football: an examination of accidents and incidents in the 1994 World Cup finals. *Br J Sports Med.* 1996;30(2):165-70.
116. Hawkins RD, Fuller CW. An examination of the frequency and severity of injuries and incidents at three levels of professional football. *Br J Sports Med.* 1998;32(4):326-32.
117. Hawkins RD, Fuller CW. A prospective epidemiological study of injuries in four English professional football clubs. *Br J Sports Med.* 1999;33(3):196-203.
118. Hawkins RD, Hulse MA, Wilkinson C, Hodson A, Gibson M. The association football medical research programme: an audit of injuries in professional football. *Br J Sports Med.* 2001;35(1):43-7.
119. Haxhiu B, Murtezani A, Zahiti B, Shalaj I, Sllamniku S. Risk Factors for Injuries in Professional Football Players. *Folia Med (Plovdiv).* 2015;57(2):138-43. doi:10.1515/folmed-2015-0033.
120. Henry T, Evans K, Snodgrass SJ, Miller A, Callister R. Risk Factors for Noncontact Ankle Injuries in Amateur Male Soccer Players: A Prospective Cohort Study. *Clin J Sport Med.* 2016;26(3):251-8. doi:10.1097/jsm.0000000000000240.
121. Herman DC, Jones D, Harrison A, Moser M, Tillman S, Farmer K et al. Concussion May Increase the Risk of Subsequent Lower Extremity Musculoskeletal Injury in Collegiate Athletes. *Sports Med.* 2016. doi:10.1007/s40279-016-0607-9.
122. Hides JA, Brown CT, Penfold L, Stanton WR. Screening the lumbopelvic muscles for a relationship to injury of the quadriceps, hamstrings, and adductor muscles among elite Australian Football League players. *The Journal of Orthopaedic and Sports Physical Therapy.* 2011;41(10):767-75.
123. Hides JA, Stanton WR. Can motor control training lower the risk of injury for professional football players? *Med Sci Sports Exerc.* 2014;46(4):762-8.
124. Hides JA, Stanton WR, Mendis MD, Franettovich Smith MM, Sexton MJ. Small Multifidus Muscle Size Predicts Football Injuries. *Orthop J Sports Med.* 2014;2(6):2325967114537588. doi:10.1177/2325967114537588.
125. Howard DR, Rubin DA, Hillen TJ, Nissman DB, Lomax J, Williams T et al. Magnetic resonance imaging as a predictor of return to play following syndesmosis (high) ankle sprains in professional football players. *Sports health.* 2012;4(6):535-43. doi:10.1177/1941738112462531.
126. Hrysmallis C. Hip adductors' strength, flexibility, and injury risk. *Journal of Strength and Conditioning Research / National Strength & Conditioning Association.* 2009;23(5):1514-7.

127. Hulin BT, Gabbett TJ, Lawson DW, Caputi P, Sampson JA. The acute:chronic workload ratio predicts injury: high chronic workload may decrease injury risk in elite rugby league players. *Br J Sports Med.* 2016;50(4):231-6. doi:10.1136/bjsports-2015-094817.
128. Inklaar H, Bol E, Schmikli SL, Mosterd WL. Injuries in male soccer players: team risk analysis. *Int J Sports Med.* 1996;17(3):229-34. doi:10.1055/s-2007-972837.
129. Ivarsson A, Johnson U. Psychological factors as predictors of injuries among senior soccer players. A prospective study. *J Sports Sci Med.* 2010;9(2):347-52.
130. Ivarsson A, Johnson U, Lindwall M, Gustafsson H, Altemyr M. Psychosocial stress as a predictor of injury in elite junior soccer: a latent growth curve analysis. *J Sci Med Sport.* 2014;17(4):366-70. doi:10.1016/j.jsams.2013.10.242.
131. Ivarsson A, Johnson U, Podlog L. Psychological predictors of injury occurrence: A prospective investigation of professional Swedish soccer players. *Journal of Sport Rehabilitation.* 2013;22:19-26.
132. Jacobson I, Tegner Y. Injuries among Swedish female elite football players: a prospective population study. *Scand J Med Sci Sports.* 2007;17(1):84-91. doi:10.1111/j.1600-0838.2006.00524.x.
133. Jain N, Murray D, Kemp S, Calder J. Frequency and trends in foot and ankle injuries within an English Premier League Football Club using a new impact factor of injury to identify a focus for injury prevention. *Foot Ankle Surg.* 2014;20(4):237-40. doi:10.1016/j.fas.2014.05.004.
134. Jaspers A, Brink MS, Probst SG, Frencken WG, Helsen WF. Relationships Between Training Load Indicators and Training Outcomes in Professional Soccer. *Sports Med.* 2016. doi:10.1007/s40279-016-0591-0.
135. Johnson U, Ivarsson A. Psychological predictors of sport injuries among junior soccer players. *Scand J Med Sci Sports.* 2011;21(1):129-36. doi:10.1111/j.1600-0838.2009.01057.x.
136. Junge A, Chomiak J, Dvorak J. Incidence of football injuries in youth players. Comparison of players from two European regions. *Am J Sports Med.* 2000;28(5 Suppl):S47-50.
137. Junge A, Dvorak J. Influence of definition and data collection on the incidence of injuries in football. *Am J Sports Med.* 2000;28(5 Suppl):S40-6.
138. Junge A, Dvorak J. Injuries in female football players in top-level international tournaments. *Br J Sports Med.* 2007;41 Suppl 1:i3-7. doi:10.1136/bjism.2007.036020.
139. Junge A, Dvorak J, Graf-Baumann T, Peterson L. Football injuries during FIFA tournaments and the Olympic Games, 1998-2001: development and implementation of an injury-reporting system. *Am J Sports Med.* 2004;32(1 Suppl):80s-9s.
140. Kemper GL, van der Sluis A, Brink MS, Visscher C, Frencken WG, Elferink-Gemser MT. Anthropometric Injury Risk Factors in Elite-standard Youth Soccer. *Int J Sports Med.* 2015;36(13):1112-7. doi:10.1055/s-0035-1555778.
141. Khan MA, Moiz JA, Raza S, Verma S, Shareef MY, Anwer S et al. Physical and balance performance following exercise induced muscle damage in male soccer players. *J Phys Ther Sci.* 2016;28(10):2942-9. doi:10.1589/jpts.28.2942.
142. Konopinski M, Graham I, Johnson MI, Jones G. The effect of hypermobility on the incidence of injury in professional football: A multi-site cohort study. *Phys Ther Sport.* 2016;21:7-13. doi:10.1016/j.ptsp.2015.12.006.
143. Konopinski MD, Jones GJ, Johnson MI. The Effect of Hypermobility on the Incidence of Injuries in Elite-Level Professional Soccer Players: A Cohort Study. *Am J Sports Med.* 2012;40(4):763-9.
144. Kristenson K, Bjerneboe J, Walden M, Andersen TE, Ekstrand J, Hagglund M. Injuries in male professional football: A prospective comparison between individual and team-based

- exposure registration. *Scand J Med Sci Sports*. 2016;26(10):1225-32. doi:10.1111/sms.12551.
145. Kristenson K, Bjerneboe J, Walden M, Ekstrand J, Andersen TE, Hagglund M. No association between surface shifts and time-loss overuse injury risk in male professional football. *J Sci Med Sport*. 2016;19(3):218-21. doi:10.1016/j.jsams.2015.06.001.
146. Kristenson K, Walden M, Ekstrand J, Hagglund M. Lower injury rates for newcomers to professional soccer: a prospective cohort study over 9 consecutive seasons. *Am J Sports Med*. 2013;41(6):1419-25. doi:10.1177/0363546513485358.
147. Krosshaug T, Steffen K, Kristianslund E, Nilstad A, Mok KM, Myklebust G et al. The Vertical Drop Jump Is a Poor Screening Test for ACL Injuries in Female Elite Soccer and Handball Players: A Prospective Cohort Study of 710 Athletes. *Am J Sports Med*. 2016. doi:10.1177/0363546515625048.
148. Kucera KL, Marshall SW, Kirkendall DT, Marchak PM, Garrett WE, Jr. Injury history as a risk factor for incident injury in youth soccer. *Br J Sports Med*. 2005;39(7):462. doi:10.1136/bjism.2004.013672.
149. Larsson D, Ekstrand J, Karlsson MK. Fracture epidemiology in male elite football players from 2001 to 2013: 'How long will this fracture keep me out?'. *Br J Sports Med*. 2016;50(12):759-63. doi:10.1136/bjsports-2015-095838.
150. Le Gall F, Carling C, Reilly T. Injuries in young elite female soccer players: an 8-season prospective study. *Am J Sports Med*. 2008;36(2):276-84. doi:10.1177/0363546507307866.
151. Le Gall F, Carling C, Reilly T, Vandewalle H, Church J, Rochcongar P. Incidence of injuries in elite French youth soccer players: a 10-season study. *Am J Sports Med*. 2006;34(6):928-38. doi:10.1177/0363546505283271.
152. Lehance C, Binet J, Bury T, Croisier JL. Muscular strength, functional performances and injury risk in professional and junior elite soccer players. *Scand J Med Sci Sports*. 2009;19(2):243-51.
153. Leung FT, Mendis MD, Stanton WR, Hides JA. The relationship between the piriformis muscle, low back pain, lower limb injuries and motor control training among elite football players. *J Sci Med Sport*. 2015;18(4):407-11. doi:10.1016/j.jsams.2014.06.011.
154. Leventer L, Eek F, Hofstetter S, Lames M. Injury Patterns among Elite Football Players: A Media-based Analysis over 6 Seasons with Emphasis on Playing Position. *Int J Sports Med*. 2016;37(11):898-908. doi:10.1055/s-0042-108201.
155. Lundblad M, Walden M, Magnusson H, Karlsson J, Ekstrand J. The UEFA injury study: 11-year data concerning 346 MCL injuries and time to return to play. *Br J Sports Med*. 2013;47(12):759-62. doi:10.1136/bjsports-2013-092305.
156. Luthje P, Nurmi I, Kataja M, Belt E, Helenius P, Kaukonen JP et al. Epidemiology and traumatology of injuries in elite soccer: a prospective study in Finland. *Scand J Med Sci Sports*. 1996;6(3):180-5.
157. Maffey L, Emery C. What are the risk factors for groin strain injury in sport? A systematic review of the literature. *Sports medicine (Auckland, NZ)*. 2007;37(10):881-94.
158. Malina RM, Morano PJ, Barron M, Miller SJ, Cumming SP, Kontos AP. Incidence and player risk factors for injury in youth football. *Clinical journal of sport medicine : official journal of the Canadian Academy of Sport Medicine*. 2006;16(3):214-22.
159. Mallo J, Dellal A. Injury risk in professional football players with special reference to the playing position and training periodization. *J Sports Med Phys Fitness*. 2012;52(6):631-8.
160. Malone S, Owen A, Newton M, Mendes B, Collins KD, Gabbett TJ. The acute:chronic workload ratio in relation to injury risk in professional soccer. *J Sci Med Sport*. 2016. doi:10.1016/j.jsams.2016.10.014.
161. McCall A, Carling C, Davison M, Nedelec M, Le Gall F, Berthoin S et al. Injury risk factors, screening tests and preventative strategies: a systematic review of the evidence that

- underpins the perceptions and practices of 44 football (soccer) teams from various premier leagues. *Br J Sports Med.* 2015;49(9):583-9.
162. McCall A, Carling C, Nedelec M, Davison M, Le Gall F, Berthoin S et al. Risk factors, testing and preventative strategies for non-contact injuries in professional football: current perceptions and practices of 44 teams from various premier leagues. *Br J Sports Med.* 2014;48(18):1352-7.
163. McCann RS, Kosik KB, Terada M, Beard MQ, Buskirk GE, Gribble PA. Prediction of Lower Extremity Injury in Collegiate Women's Soccer Players: 190 Board #27 June 1, 11: 00 AM - 12: 30 PM. *Med Sci Sports Exerc.* 2016;48(5 Suppl 1):37. doi:10.1249/01.mss.0000485121.94956.e2.
164. McDowell KW, Miller AB, Johnson RJ, Fox BM, Krueger B, Waggener JD. Comparing Soft Tissue Injury Rate Using the Functional Movement Screen in Division I Football Players: 377 Board #214 June 1, 11: 00 AM - 12: 30 PM. *Med Sci Sports Exerc.* 2016;48(5 Suppl 1):101. doi:10.1249/01.mss.0000485308.93167.37.
165. McGregor JC, Rae A. A review of injuries to professional footballers in a premier football team (1990-93). *Scott Med J.* 1995;40(1):16-8.
166. Mendiguchia J, Alentorn-Geli E, Idoate F, Myer GD. Rectus femoris muscle injuries in football: a clinically relevant review of mechanisms of injury, risk factors and preventive strategies. *Br J Sports Med.* 2013;47(6):359-66. doi:10.1136/bjsports-2012-091250.
167. Mohamed EE, Useh U, Mtshali BF. Q-angle, Pelvic width, and Intercondylar notch width as predictors of knee injuries in women soccer players in South Africa. *Afr Health Sci.* 2012;12(2):174-80. doi:10.4314/ahs.v12i2.15.
168. Mozes M, Papa MZ, Zweig A, Horoszowski H, Adar R. Iliopsoas injury in soccer players. *Br J Sports Med.* 1985;19(3):168-70.
169. Muckle DS. Injuries in professional footballers. *Br J Sports Med.* 1981;15(1):77-9.
170. Mueller-Wohlfahrt HW, Haensel L, Mithoefer K, Ekstrand J, English B, McNally S et al. Terminology and classification of muscle injuries in sport: the Munich consensus statement. *Br J Sports Med.* 2013;47(6):342-50. doi:10.1136/bjsports-2012-091448.
171. Mufty S, Bollars P, Vanlommel L, Van Crombrugge K, Corten K, Bellemans J. Injuries in male versus female soccer players: epidemiology of a nationwide study. *Acta Orthop Belg.* 2015;81(2):289-95.
172. Murray NB, Gabbett TJ, Townshend AD. Relationship Between Pre-Season Training Load and In-Season Availability in Elite Australian Football Players. *Int J Sports Physiol Perform.* 2016:1-21. doi:10.1123/ijssp.2015-0806.
173. Murray NB, Gabbett TJ, Townshend AD, Hulin BT, McLellan CP. Individual and combined effects of acute and chronic running loads on injury risk in elite Australian footballers. *Scand J Med Sci Sports.* 2016. doi:10.1111/sms.12719.
174. Myer GD, Ford KR, Brent JL, Hewett TE. An integrated approach to change the outcome part i: Neuromuscular screening methods to identify high acl injury risk athletes. *J Strength Cond Res.* 2012;26(8):2265-71.
175. Nassis GP, Gabbett TJ. Is workload associated with injuries and performance in elite football? A call for action. *Br J Sports Med.* 2016. doi:10.1136/bjsports-2016-095988.
176. Nilsson T, Ostenberg AH, Alricsson M. Injury profile among elite male youth soccer players in a Swedish first league. *Journal of exercise rehabilitation.* 2016;12(2):83-9. doi:10.12965/jer.1632548.274.
177. Nordstrom A, Nordstrom P, Ekstrand J. Sports-related concussion increases the risk of subsequent injury by about 50% in elite male football players. *Br J Sports Med.* 2014;48(19):1447-50. doi:10.1136/bjsports-2013-093406.

178. Noya Salces J, Gomez-Carmona PM, Gracia-Marco L, Moliner-Urdiales D, Sillero-Quintana M. Epidemiology of injuries in First Division Spanish football. *J Sports Sci*. 2014;32(13):1263-70. doi:10.1080/02640414.2014.884720.
179. Opar DA, Williams MD, Shield AJ. Hamstring strain injuries: factors that lead to injury and re-injury. *Sports medicine (Auckland, NZ)*. 2012;42(3):209-26.
180. Orchard J, Marsden J, Lord S, Garlick D. Preseason hamstring muscle weakness associated with hamstring muscle injury in Australian footballers. *The American Journal of Sports Medicine*. 1997;25(1):81-5.
181. Orchard J, Seward H. Epidemiology of injuries in the Australian Football League, seasons 1997-2000. *Br J Sports Med*. 2002;36(1):39-44.
182. Orchard J, Seward H, McGivern J, Hood S. Intrinsic and extrinsic risk factors for anterior cruciate ligament injury in Australian footballers. *Am J Sports Med*. 2001;29(2):196-200.
183. Orchard J, Wood T, Seward H, Broad A. Comparison of injuries in elite senior and junior Australian football. *J Sci Med Sport*. 1998;1(2):83-8.
184. Orchard JW. Intrinsic and extrinsic risk factors for muscle strains in Australian football. *Am J Sports Med*. 2001;29(3):300-3.
185. Ostenberg A, Roos H. Injury risk factors in female European football. A prospective study of 123 players during one season. *Scand J Med Sci Sports*. 2000;10(5):279-85.
186. Owen A, Dunlop G, Rouissi M, Chtara M, Paul D, Zouhal H et al. The relationship between lower-limb strength and match-related muscle damage in elite level professional European soccer players. *J Sports Sci*. 2015;33(20):2100-5. doi:10.1080/02640414.2015.1064155.
187. Owen AL, Forsyth JJ, Wong del P, Dellal A, Connelly SP, Chamari K. Heart rate-based training intensity and its impact on injury incidence among elite-level professional soccer players. *J Strength Cond Res*. 2015;29(6):1705-12. doi:10.1519/jsc.0000000000000810.
188. Paajanen H, Ristolainen L, Turunen H, Kujala UM. Prevalence and etiological factors of sport-related groin injuries in top-level soccer compared to non-contact sports. *Arch Orthop Trauma Surg*. 2011;131(2):261-6. doi:10.1007/s00402-010-1169-1.
189. Padua DA, DiStefano LJ, Beutler AI, de la Motte SJ, DiStefano MJ, Marshall SW. The Landing Error Scoring System as a Screening Tool for an Anterior Cruciate Ligament Injury-Prevention Program in Elite-Youth Soccer Athletes. *Journal of athletic training*. 2015;50(6):589-95.
190. Paul DJ, Nassis GP, Whiteley R, Marques JB, Kenneally D, Chalabi H. Acute responses of soccer match play on hip strength and flexibility measures: potential measure of injury risk. *J Sports Sci*. 2014;32(13):1318-23. doi:10.1080/02640414.2014.927069.
191. Petersen J, Thorborg K, Nielsen MB, Holmich P. Acute hamstring injuries in Danish elite football: a 12-month prospective registration study among 374 players. *Scand J Med Sci Sports*. 2010;20(4):588-92. doi:10.1111/j.1600-0838.2009.00995.x.
192. Petersen J, Thorborg K, Nielsen MB, Skjodt T, Bolvig L, Bang N et al. The diagnostic and prognostic value of ultrasonography in soccer players with acute hamstring injuries. *Am J Sports Med*. 2014;42(2):399-404. doi:10.1177/0363546513512779.
193. Pfirrmann D, Herbst M, Ingelfinger P, Simon P, Tug S. Analysis of Injury Incidences in Male Professional Adult and Elite Youth Soccer Players: A Systematic Review. *Journal of athletic training*. 2016;51(5):410-24. doi:10.4085/1062-6050-51.6.03.
194. Price RJ, Hawkins RD, Hulse MA, Hodson A. The Football Association medical research programme: an audit of injuries in academy youth football. *Br J Sports Med*. 2004;38(4):466-71. doi:10.1136/bjism.2003.005165.
195. Pruna R, Ribas J, Montoro JB, Artells R. The impact of single nucleotide polymorphisms on patterns of non-contact musculoskeletal soft tissue injuries in a football

- player population according to ethnicity. *Med Clin (Barc)*. 2015;144(3):105-10. doi:10.1016/j.medcli.2013.09.026.
196. Pruyne EC, Watsford ML, Murphy AJ, Pine MJ, Spurrs RW, Cameron ML et al. Relationship between leg stiffness and lower body injuries in professional Australian football. *J Sports Sci*. 2012;30(1):71-8.
197. Raimondi S, Taioli E. Predictors of moderate and severe injuries in Italian major leagues soccer teams: results from a cohort study. *J Sports Med Phys Fitness*. 2007;47(4):455-61.
198. Read PJ, Oliver JL, De Ste Croix MB, Myer GD, Lloyd RS. Neuromuscular Risk Factors for Knee and Ankle Ligament Injuries in Male Youth Soccer Players. *Sports Med*. 2016;46(8):1059-66. doi:10.1007/s40279-016-0479-z.
199. Read PJ, Oliver JL, de Ste Croix MB, Myer GD, Lloyd RS. Reliability of the Tuck Jump Injury Risk Screening Assessment in Elite Male Youth Soccer Players. *J Strength Cond Res*. 2016;30(6):1510-6. doi:10.1519/jsc.0000000000001260.
200. Renshaw A, Goodwin PC. Injury incidence in a Premier League youth soccer academy using the consensus statement: a prospective cohort study. *BMJ open sport & exercise medicine*. 2016;2(1):e000132. doi:10.1136/bmjsem-2016-000132.
201. Robinson P, Grainger AJ, Hensor EM, Batt ME, O'Connor PJ. Do MRI and ultrasound of the anterior pelvis correlate with, or predict, young football players' clinical findings? A 4-year prospective study of elite academy soccer players. *Br J Sports Med*. 2015;49(3):176-82. doi:10.1136/bjsports-2013-092932.
202. Rogalski B, Dawson B, Heasman J, Gabbett TJ. Training and game loads and injury risk in elite Australian footballers. *Journal of Science and Medicine in Sport / Sports Medicine Australia*. 2013;16(6):499-503.
203. Romiti M, Finch CF, Gabbe B. A prospective cohort study of the incidence of injuries among junior Australian football players: evidence for an effect of playing-age level. *Br J Sports Med*. 2008;42(6):441-6.
204. Roos KG, Wasserman EB, Dalton SL, Gray A, Djoko A, Dompier TP et al. Epidemiology of 3825 injuries sustained in six seasons of National Collegiate Athletic Association men's and women's soccer (2009/2010-2014/2015). *Br J Sports Med*. 2016. doi:10.1136/bjsports-2015-095718.
205. Rynnanen J, Dvorak J, Peterson L, Kautiainen H, Karlsson J, Junge A et al. Increased risk of injury following red and yellow cards, injuries and goals in FIFA World Cups. *Br J Sports Med*. 2013;47(15):970-3. doi:10.1136/bjsports-2013-092487.
206. Shojaedin SS, Letafatkar A, Hadadnezhad M, Dehkhoda MR. Relationship between functional movement screening score and history of injury and identifying the predictive value of the FMS for injury. *International journal of injury control and safety promotion*. 2014;21(4):355-60. doi:10.1080/17457300.2013.833942.
207. Small K, McNaughton LR, Greig M, Lohkamp M, Lovell R. Soccer fatigue, sprinting and hamstring injury risk. *Int J Sports Med*. 2009;30(8):573-8. doi:10.1055/s-0029-1202822.
208. Sman AD, Hiller CE, Rae K, Linklater J, Morellato J, Trist N et al. Predictive factors for ankle syndesmosis injury in football players: A prospective study. *J Sci Med Sport*. 2014;17(6):586-90.
209. Snoeker BA, Bakker EW, Kegel CA, Lucas C. Risk factors for meniscal tears: a systematic review including meta-analysis. *J Orthop Sports Phys Ther*. 2013;43(6):352-67. doi:10.2519/jospt.2013.4295.
210. Soderman K, Adolphson J, Lorentzon R, Alfredson H. Injuries in adolescent female players in European football: a prospective study over one outdoor soccer season. *Scand J Med Sci Sports*. 2001;11(5):299-304.

211. Soderman K, Alfredson H, Pietila T, Werner S. Risk factors for leg injuries in female soccer players: a prospective investigation during one out-door season. *Knee Surg Sports Traumatol Arthrosc.* 2001;9(5):313-21. doi:10.1007/s001670100228.
212. Soligard T, Grindem H, Bahr R, Andersen TE. Are skilled players at greater risk of injury in female youth football? *Br J Sports Med.* 2010;44(15):1118-23.
213. Steffen K, Nilstad A, Kristianslund EK, Myklebust G, Bahr R, Krosshaug T. Association between Lower Extremity Muscle Strength and Noncontact ACL Injuries. *Med Sci Sports Exerc.* 2016;48(11):2082-9. doi:10.1249/mss.0000000000001014.
214. Steffen K, Pensgaard AM, Bahr R. Self-reported psychological characteristics as risk factors for injuries in female youth football. *Scand J Med Sci Sports.* 2009;19(3):442-51. doi:10.1111/j.1600-0838.2008.00797.x.
215. Stubbe JH, van Beijsterveldt AM, van der Knaap S, Stege J, Verhagen EA, van Mechelen W et al. Injuries in professional male soccer players in the Netherlands: a prospective cohort study. *Journal of athletic training.* 2015;50(2):211-6. doi:10.4085/1062-6050-49.3.64.
216. Svensson K, Alicicsson M, Karneback G, Magounakis T, Werner S. Muscle injuries of the lower extremity: a comparison between young and old male elite soccer players. *Knee Surg Sports Traumatol Arthrosc.* 2016;24(7):2293-9. doi:10.1007/s00167-015-3527-6.
217. Svensson K, Eckerman M, Alicicsson M, Magounakis T, Werner S. Muscle injuries of the dominant or non-dominant leg in male football players at elite level. *Knee Surg Sports Traumatol Arthrosc.* 2016. doi:10.1007/s00167-016-4200-4.
218. Tegnander A, Olsen OE, Moholdt TT, Engebretsen L, Bahr R. Injuries in Norwegian female elite soccer: a prospective one-season cohort study. *Knee Surg Sports Traumatol Arthrosc.* 2008;16(2):194-8. doi:10.1007/s00167-007-0403-z.
219. Thompson NJ, Morris RD. Predicting injury risk in adolescent football players: the importance of psychological variables. *J Pediatr Psychol.* 1994;19(4):415-29.
220. Tourny C, Sangnier S, Cotte T, Langlois R, Coquart J. Epidemiologic study of young soccer player's injuries in U12 to U20. *J Sports Med Phys Fitness.* 2014;54(4):526-35.
221. Uebliacker P, Muller-Wohlfahrt HW, Ekstrand J. Epidemiological and clinical outcome comparison of indirect ('strain') versus direct ('contusion') anterior and posterior thigh muscle injuries in male elite football players: UEFA Elite League study of 2287 thigh injuries (2001-2013). *Br J Sports Med.* 2015;49(22):1461-5. doi:10.1136/bjsports-2014-094285.
222. Ullah S, Gabbett TJ, Finch CF. Statistical modelling for recurrent events: an application to sports injuries. *Br J Sports Med.* 2014;48(17):1287-93. doi:10.1136/bjsports-2011-090803.
223. van der Sluis A, Elferink-Gemser MT, Brink MS, Visscher C. Importance of Peak Height Velocity Timing in Terms of Injuries in Talented Soccer Players. *Int J Sports Med.* 2015;36(4):327-32.
224. van der Sluis A, Elferink-Gemser MT, Coelho-e-Silva MJ, Nijboer JA, Brink MS, Visscher C. Sport injuries aligned to peak height velocity in talented pubertal soccer players. *Int J Sports Med.* 2014;35(4):351-5. doi:10.1055/s-0033-1349874.
225. van Doormaal MC, van der Horst N, Backx FJ, Smits DW, Huisstede BM. No Relationship Between Hamstring Flexibility and Hamstring Injuries in Male Amateur Soccer Players: A Prospective Study. *Am J Sports Med.* 2016. doi:10.1177/0363546516664162.
226. Vanlommel L, Vanlommel J, Bollars P, Quisquater L, Van Crombrugge K, Corten K et al. Incidence and risk factors of lower leg fractures in Belgian soccer players. *Injury.* 2013;44(12):1847-50. doi:10.1016/j.injury.2013.07.002.
227. Venturelli M, Schena F, Zanolla L, Bishop D. Injury risk factors in young soccer players detected by a multivariate survival model. *Journal of Science and Medicine in Sport / Sports Medicine Australia.* 2011;14(4):293-8.



228. Verhagen EA. Recurrent injury in elite football. *Clin J Sport Med.* 2007;17(6):514-5. doi:10.1097/01.jsm.0000299223.29279.80.
229. Verrall GM, Slavotinek JP, Barnes PG, Fon GT, Spriggins AJ. Clinical risk factors for hamstring muscle strain injury: a prospective study with correlation of injury by magnetic resonance imaging. *Br J Sports Med.* 2001;35(6):435-40.
230. Veugelers KR, Young WB, Fahrner B, Harvey JT. Different methods of training load quantification and their relationship to injury and illness in elite Australian football. *J Sci Med Sport.* 2016;19(1):24-8. doi:10.1016/j.jsams.2015.01.001.
231. Walden M, Hagglund M, Ekstrand J. UEFA Champions League study: a prospective study of injuries in professional football during the 2001-2002 season. *Br J Sports Med.* 2005;39(8):542-6. doi:10.1136/bjism.2004.014571.
232. Walden M, Hagglund M, Ekstrand J. Injuries in Swedish elite football--a prospective study on injury definitions, risk for injury and injury pattern during 2001. *Scand J Med Sci Sports.* 2005;15(2):118-25. doi:10.1111/j.1600-0838.2004.00393.x.
233. Walden M, Hagglund M, Ekstrand J. The epidemiology of groin injury in senior football: a systematic review of prospective studies. *Br J Sports Med.* 2015;49(12):792-7. doi:10.1136/bjsports-2015-094705.
234. Walden M, Hagglund M, Magnusson H, Ekstrand J. ACL injuries in men's professional football: a 15-year prospective study on time trends and return-to-play rates reveals only 65% of players still play at the top level 3 years after ACL rupture. *Br J Sports Med.* 2016;50(12):744-50. doi:10.1136/bjsports-2015-095952.
235. Walden M, Hagglund M, Orchard J, Kristenson K, Ekstrand J. Regional differences in injury incidence in European professional football. *Scand J Med Sci Sports.* 2013;23(4):424-30. doi:10.1111/j.1600-0838.2011.01409.x.
236. Walden M, Hagglund M, Werner J, Ekstrand J. The epidemiology of anterior cruciate ligament injury in football (soccer): a review of the literature from a gender-related perspective. *Knee Surg Sports Traumatol Arthrosc.* 2011;19(1):3-10. doi:10.1007/s00167-010-1172-7.
237. Warren P, Gabbe BJ, Schneider-Kolsky M, Bennell KL. Clinical predictors of time to return to competition and of recurrence following hamstring strain in elite Australian footballers. *Br J Sports Med.* 2010;44(6):415-9. doi:10.1136/bjism.2008.048181.
238. Waterman BR, Belmont PJ, Jr., Cameron KL, Svoboda SJ, Alitz CJ, Owens BD. Risk factors for syndesmotom and medial ankle sprain: role of sex, sport, and level of competition. *Am J Sports Med.* 2011;39(5):992-8. doi:10.1177/0363546510391462.
239. Watsford ML, Murphy AJ, McLachlan KA, Bryant AL, Cameron ML, Crossley KM et al. A prospective study of the relationship between lower body stiffness and hamstring injury in professional Australian rules footballers. *Am J Sports Med.* 2010;38(10):2058-64. doi:10.1177/0363546510370197.
240. Watson A, Brickson S, Brooks A, Dunn W. Subjective well-being and training load predict in-season injury and illness risk in female youth soccer players. *Br J Sports Med.* 2016. doi:10.1136/bjsports-2016-096584.
241. Wekesa M. A one year prospective study of soccer injuries in the 1992-1993 Kenyan national team. *Afr J Health Sci.* 1995;2(4):392-4.
242. Werner J, Hagglund M, Walden M, Ekstrand J. UEFA injury study: a prospective study of hip and groin injuries in professional football over seven consecutive seasons. *Br J Sports Med.* 2009;43(13):1036-40. doi:10.1136/bjism.2009.066944.
243. Wilkerson GB, Colston MA. A Refined Prediction Model for Core and Lower Extremity Sprains and Strains Among Collegiate Football Players. *Journal of Athletic Training (Allen Press).* 2015;50(6):643-50.

244. Witvrouw E, Danneels L, Asselman P, D'Have T, Cambier D. Muscle flexibility as a risk factor for developing muscle injuries in male professional soccer players. A prospective study. *Am J Sports Med.* 2003;31(1):41-6.
245. Woods C, Hawkins R, Hulse M, Hodson A. The Football Association Medical Research Programme: an audit of injuries in professional football-analysis of preseason injuries. *Br J Sports Med.* 2002;36(6):436-41; discussion 41.
246. Woods C, Hawkins R, Hulse M, Hodson A. The Football Association Medical Research Programme: an audit of injuries in professional football: an analysis of ankle sprains. *Br J Sports Med.* 2003;37(3):233-8.
247. Woods C, Hawkins RD, Maltby S, Hulse M, Thomas A, Hodson A. The Football Association Medical Research Programme: an audit of injuries in professional football--analysis of hamstring injuries. *Br J Sports Med.* 2004;38(1):36-41.
248. Yeung J, Cleves A, Griffiths H, Nokes L. Mobility, proprioception, strength and FMS as predictors of injury in professional footballers. *BMJ open sport & exercise medicine.* 2016;2(1):e000134. doi:10.1136/bmjsem-2016-000134.
